# Supplementary material for: An efficient synthesis of a C12-higher sugar aminoalditol
Source: publisher site journal article supplement (doi:10.3762/bjoc.13.213), 2017-10-16
Supplement: Additional file 1 [file 1860-5397-13-213-S1.pdf]

**Supporting information**  
**for**  
**An efficient synthesis of a C<sub>12</sub>-higher sugar aminoalditol**

Łukasz Szyszka, Anna Osuch-Kwiatkowska, Mykhaylo A. Potopnyk, and Sławomir Jarosz\*

Address: Institute of Organic Chemistry, Polish Academy of Sciences, Kasprzaka 44/52, 01-224 Warsaw, Poland

Email: Sławomir Jarosz - [slawomir.jarosz@icho.edu.pl](mailto:slawomir.jarosz@icho.edu.pl)

\* Corresponding author

**Copies of NMR spectra**

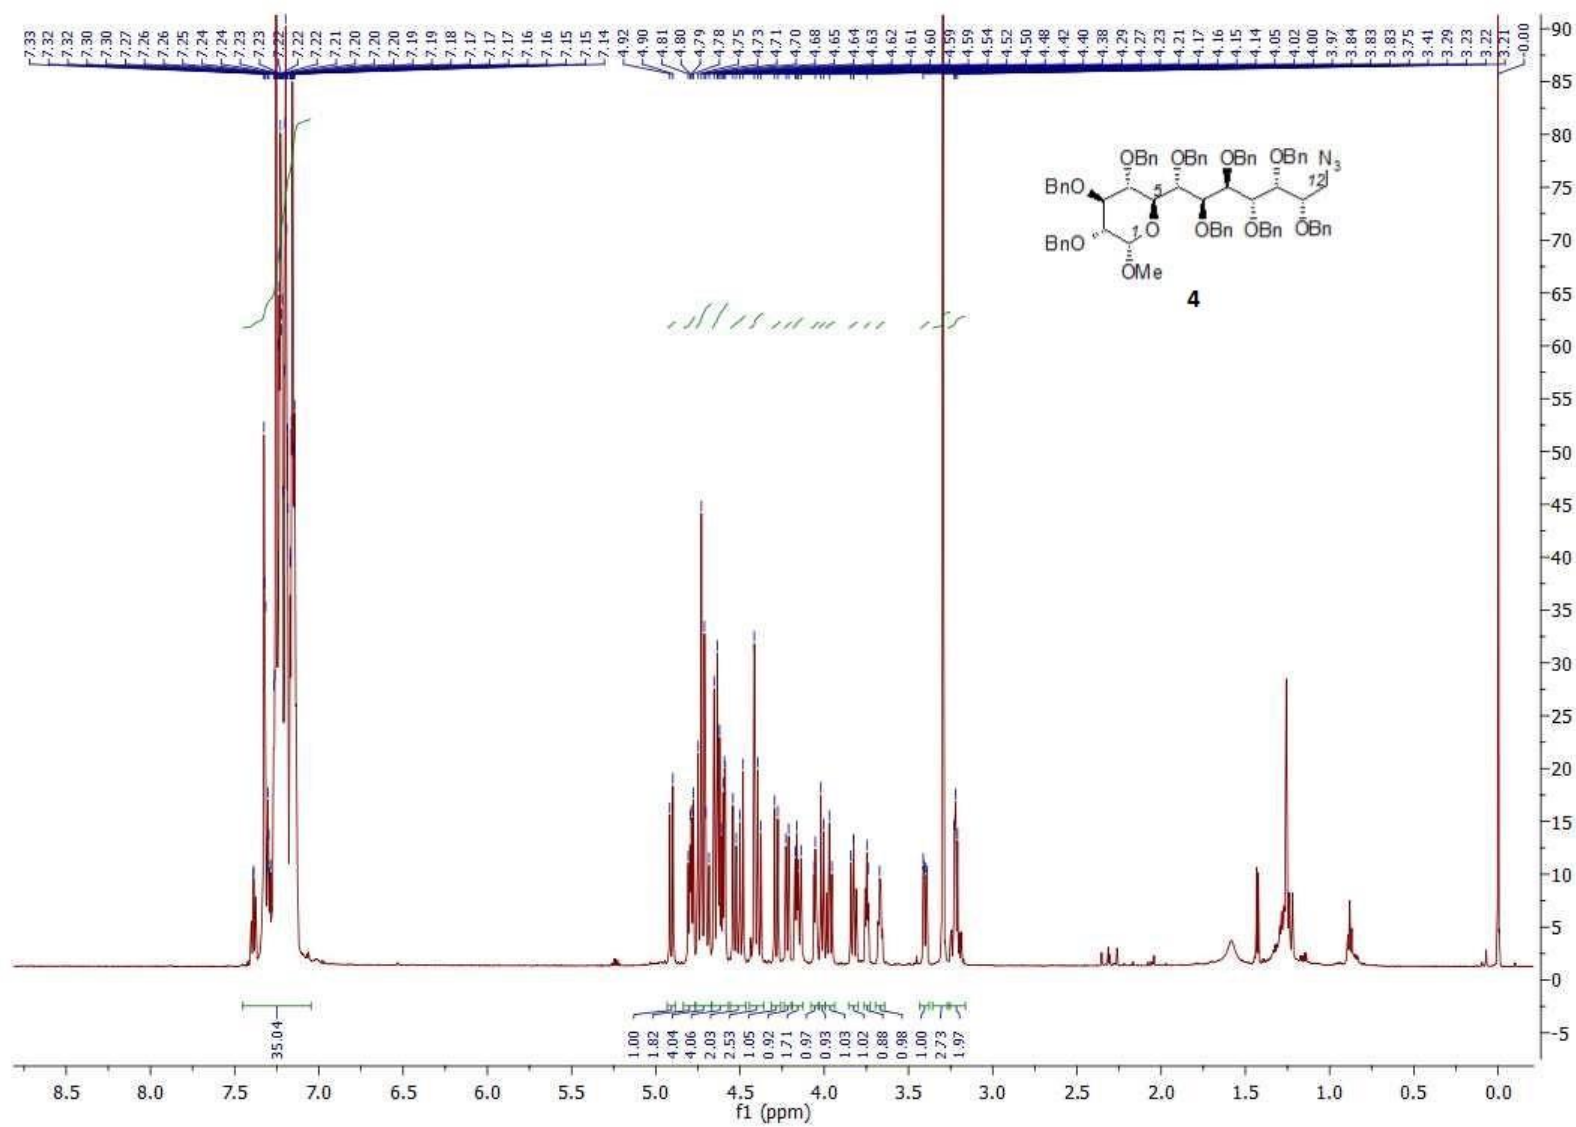

**Figure S1:  $^1\text{H}$  NMR spectrum of compound 4.**

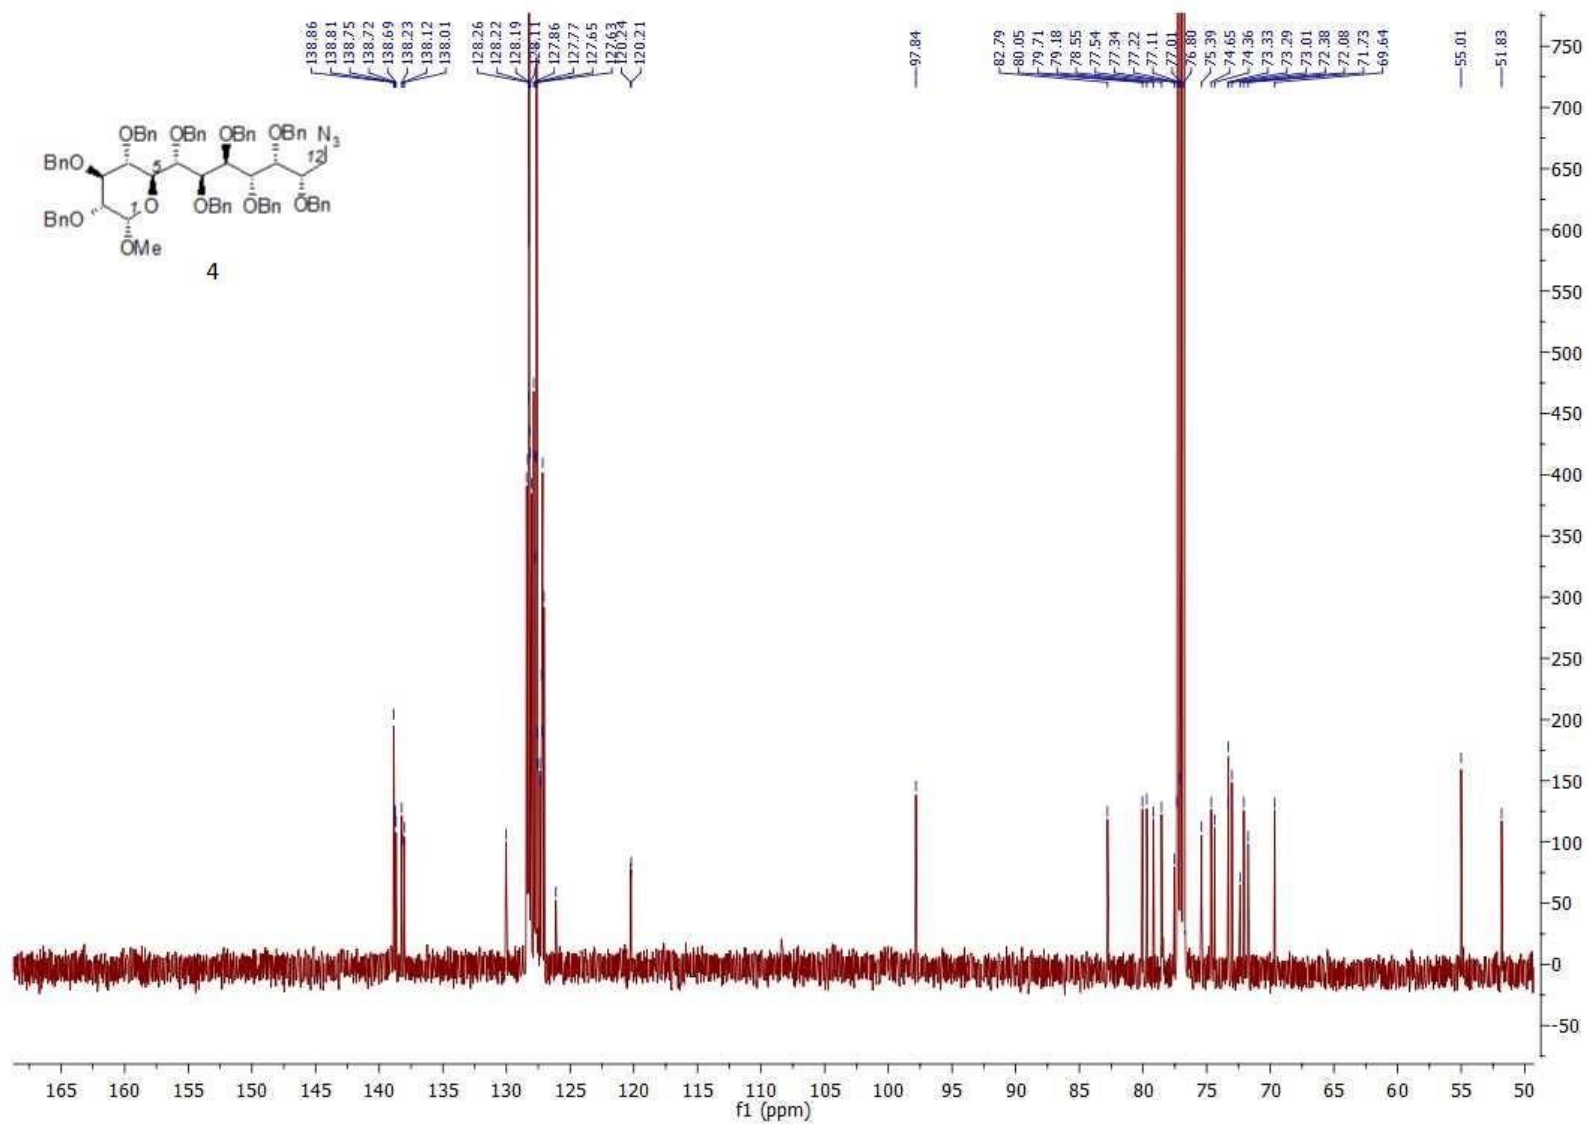

Figure S2: <sup>13</sup>C NMR spectrum of compound 4.

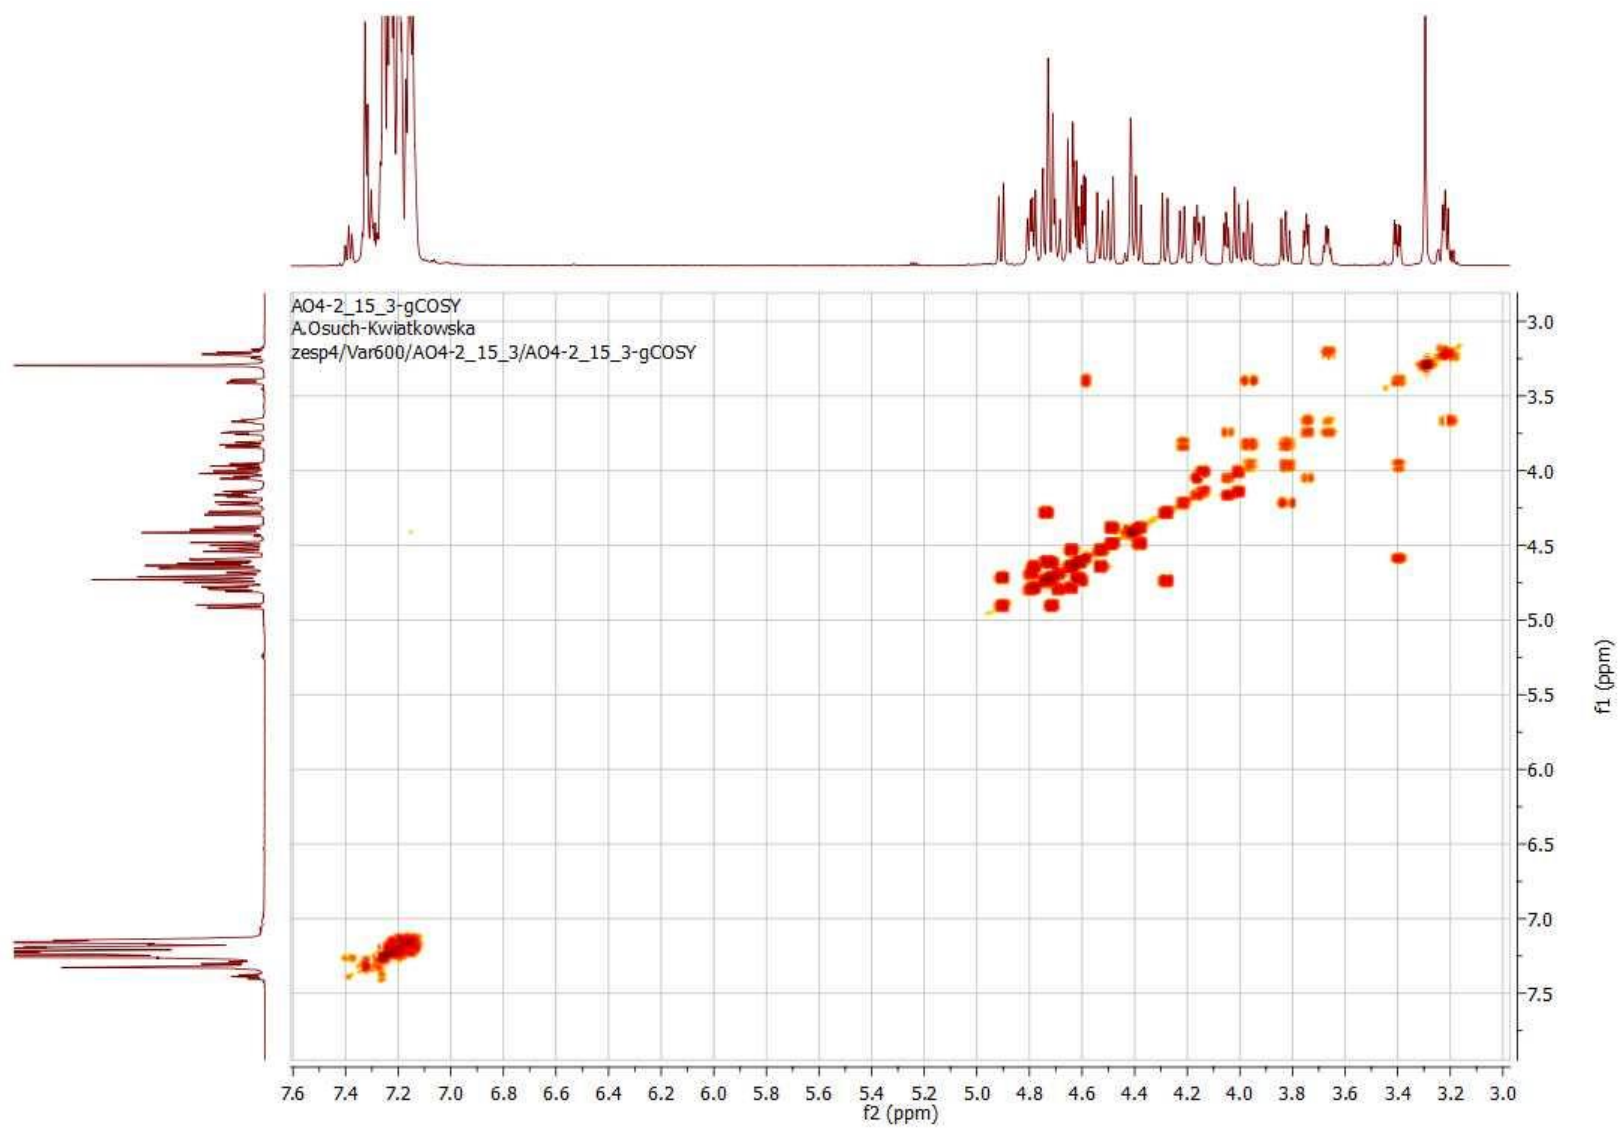

**Figure S3:** gCOSY spectrum of compound **4**.

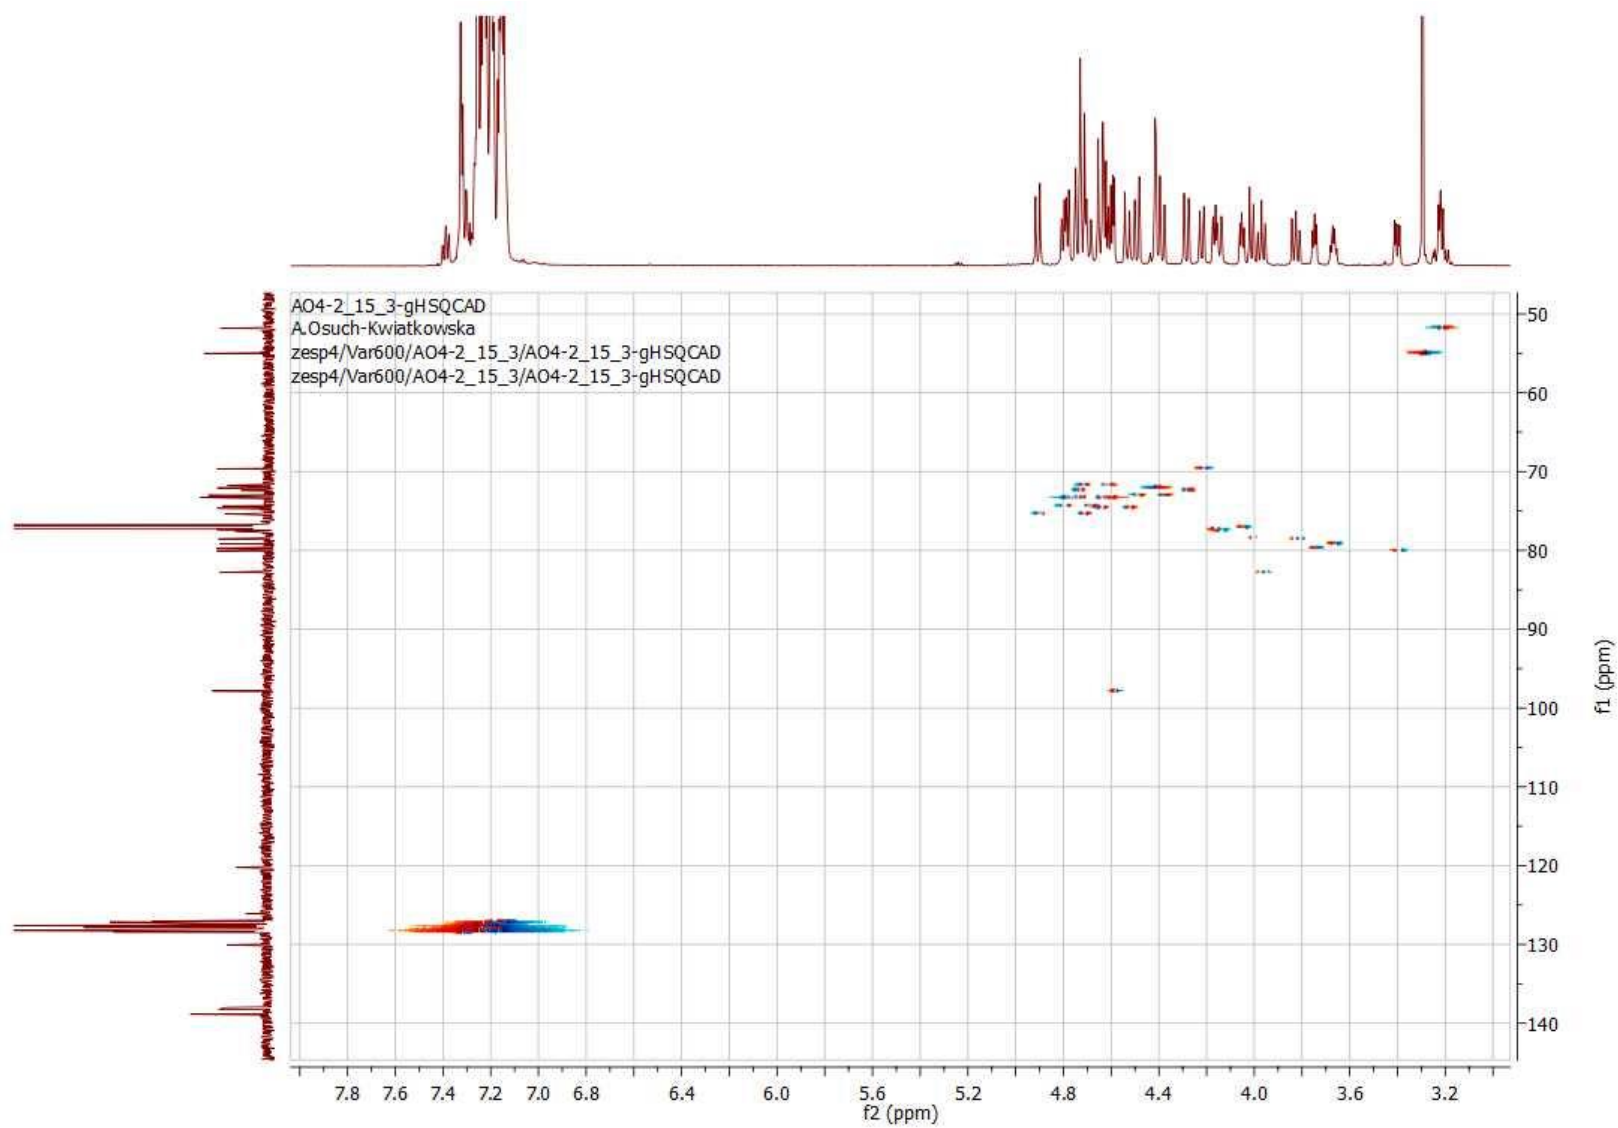

**Figure S4:** gHSQCAD spectrum of compound **4**.



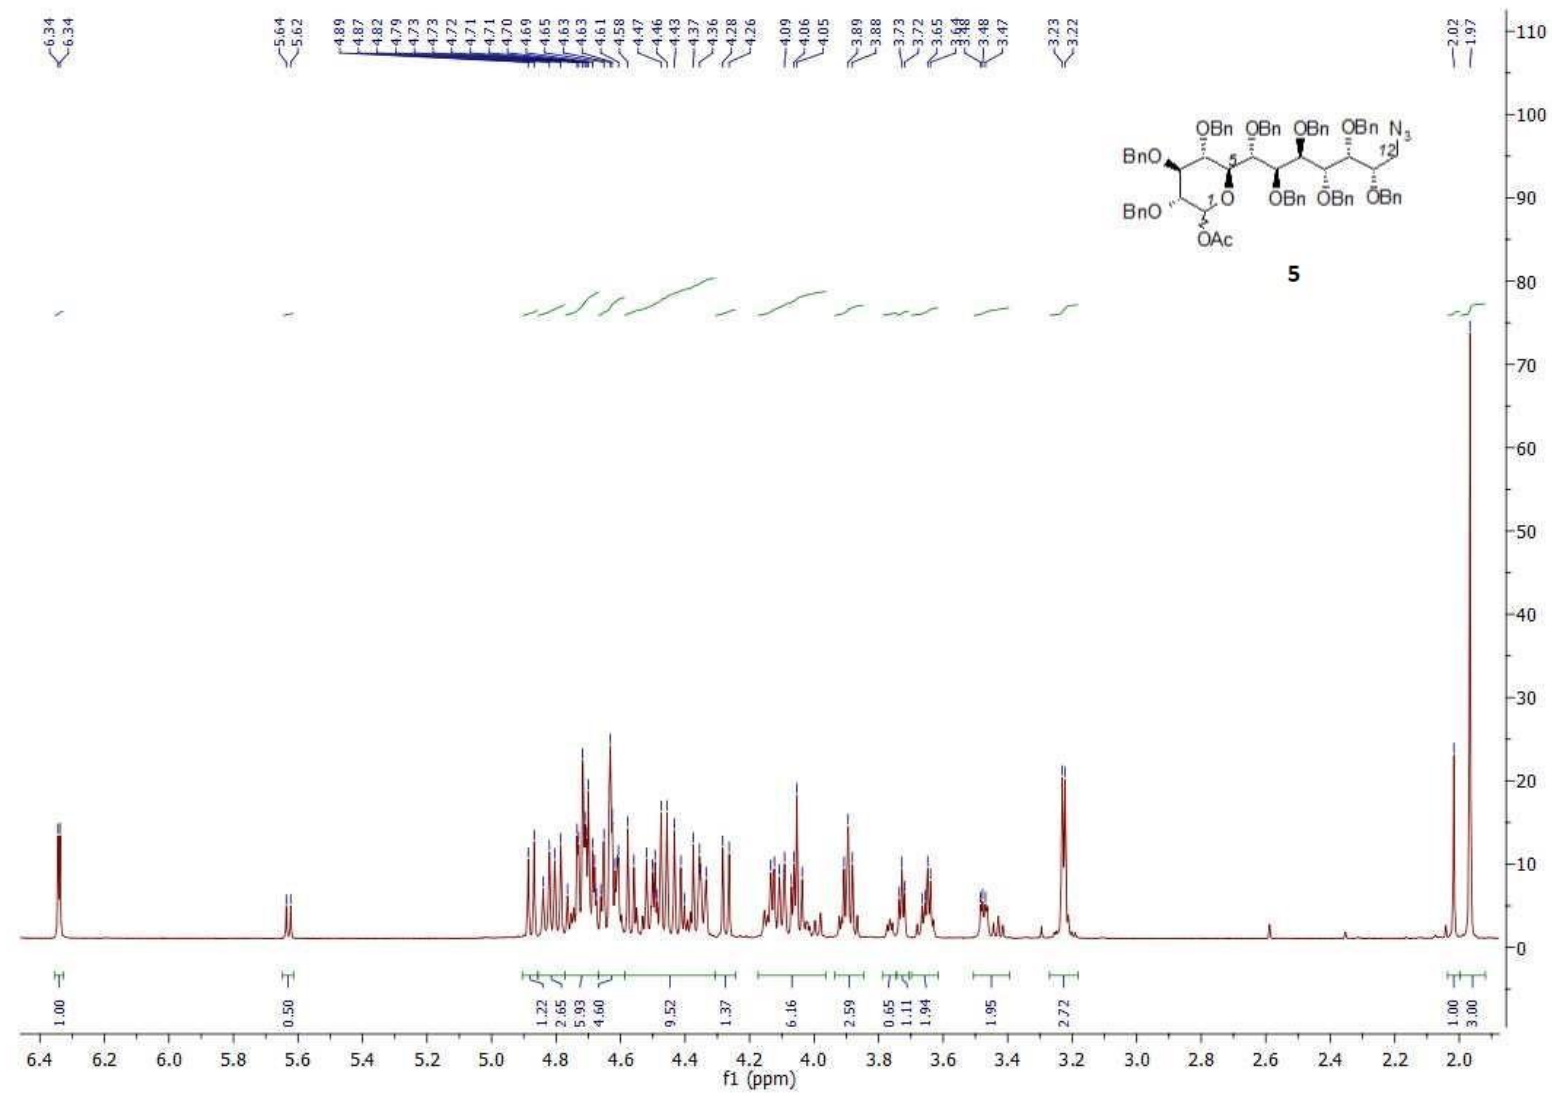

**Figure S6:** <sup>1</sup>H NMR spectrum (aliphatic part) of compound 5.

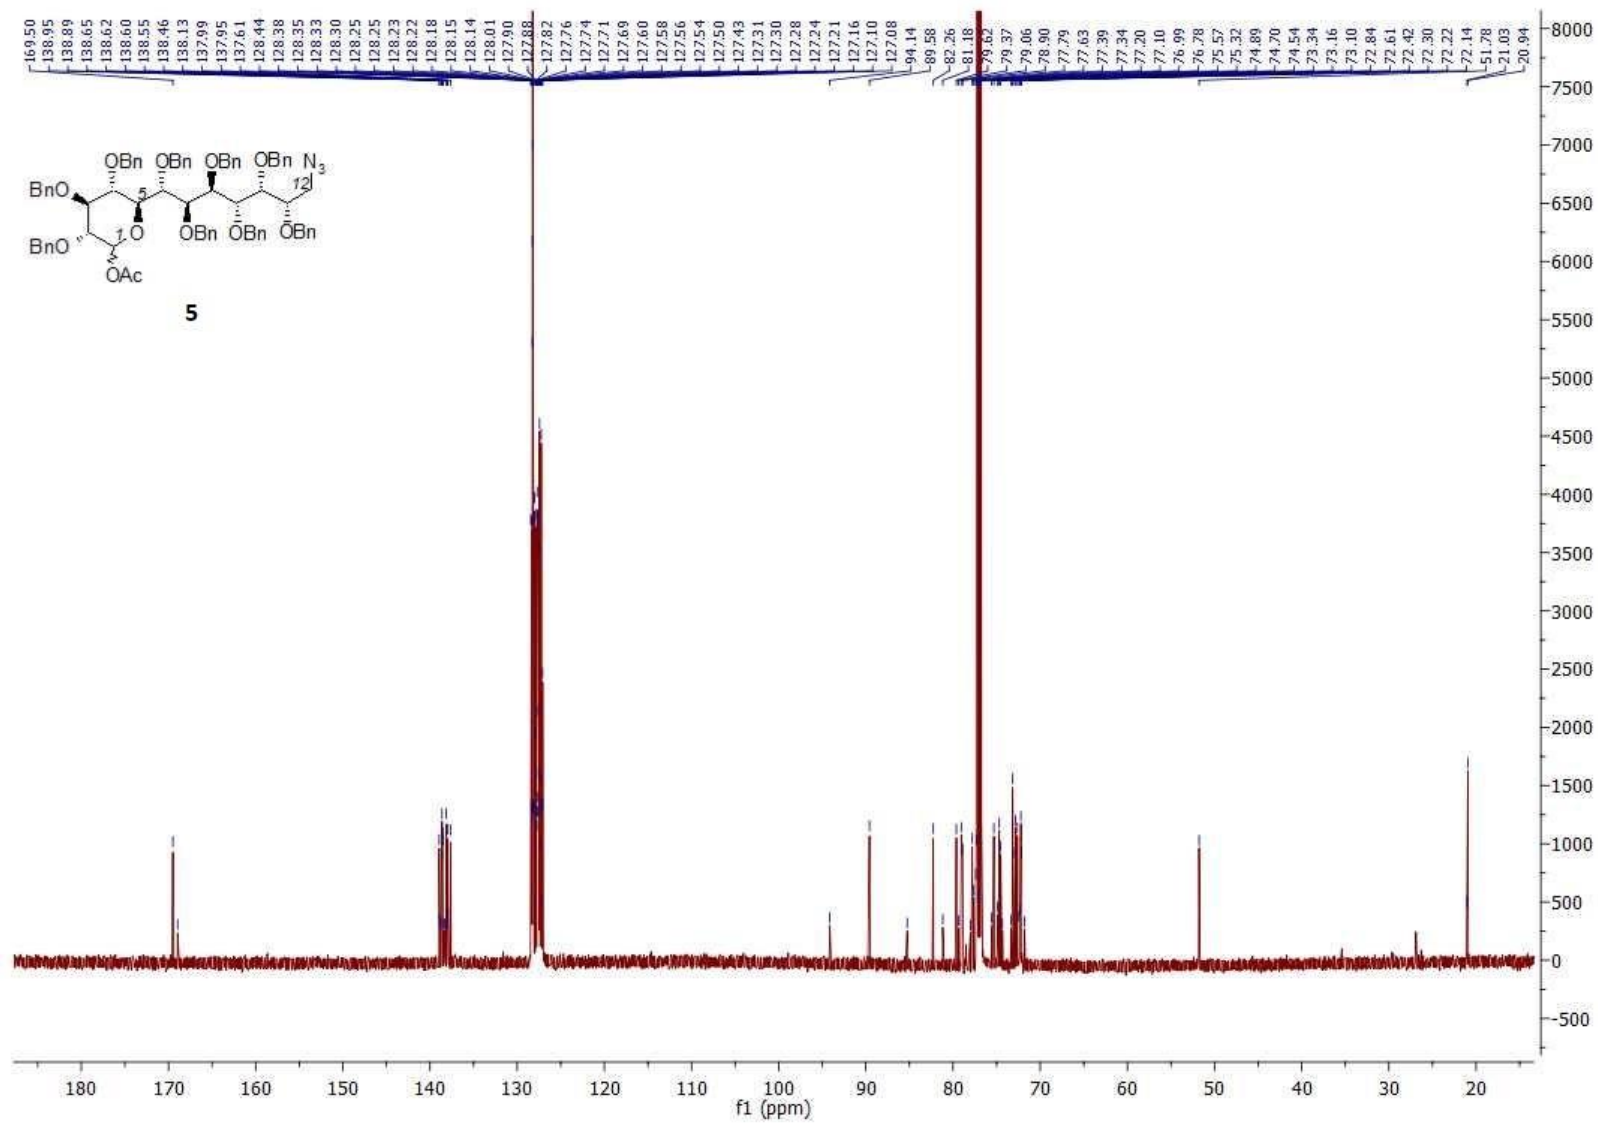

Figure S7:  $^{13}\text{C}$  NMR spectrum of compound 5.



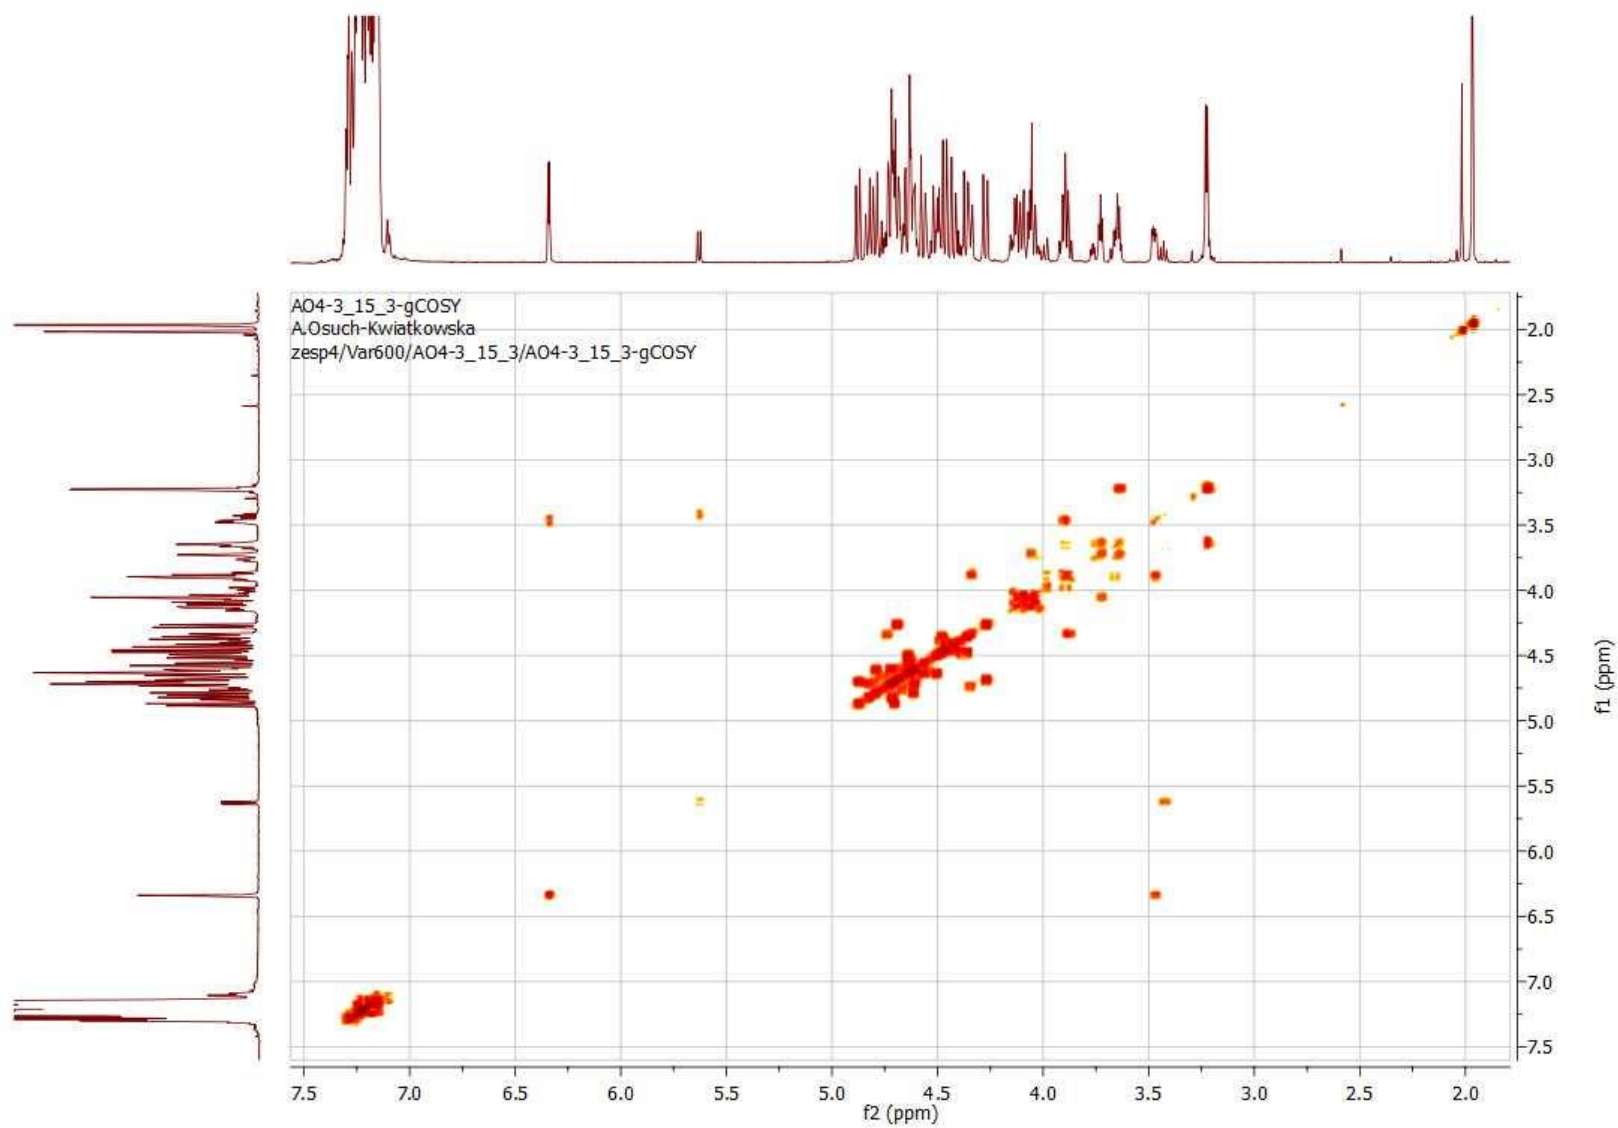

**Figure S8:** gCOSY spectrum of compound **5**.

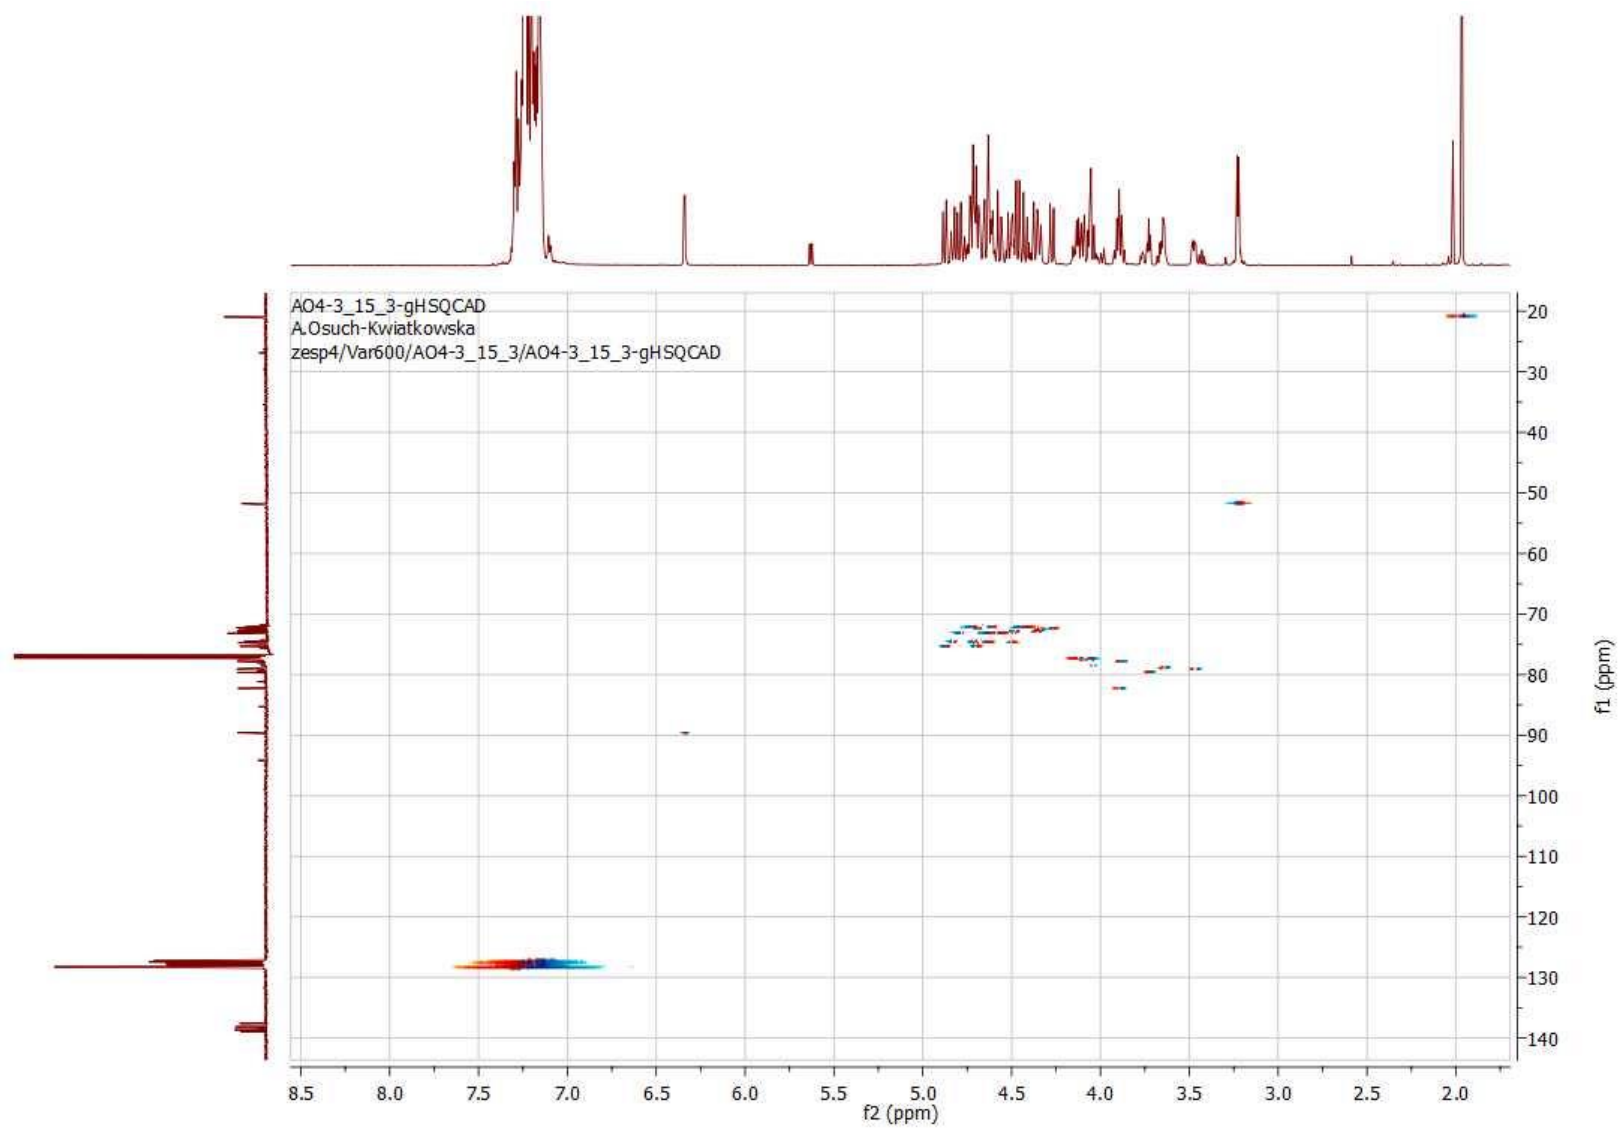

**Figure S9:** gHSQCAD spectrum of compound 5.

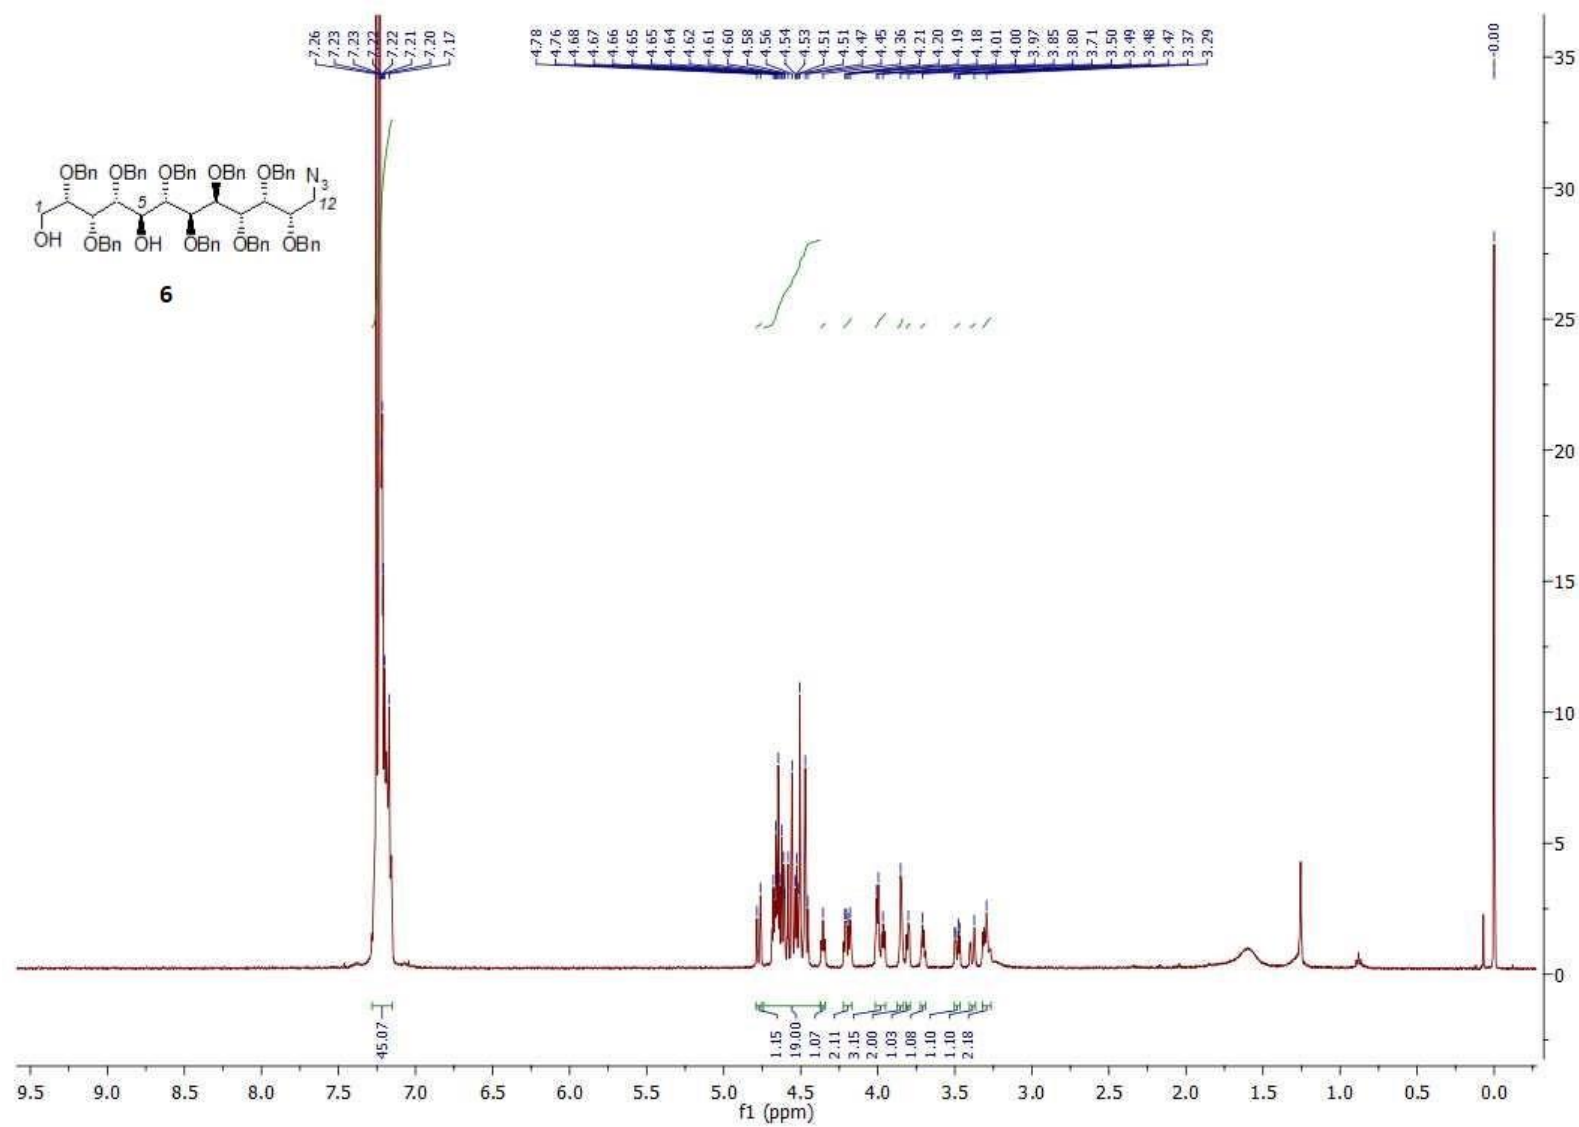

Figure S10: <sup>1</sup>H NMR spectrum of compound 6.

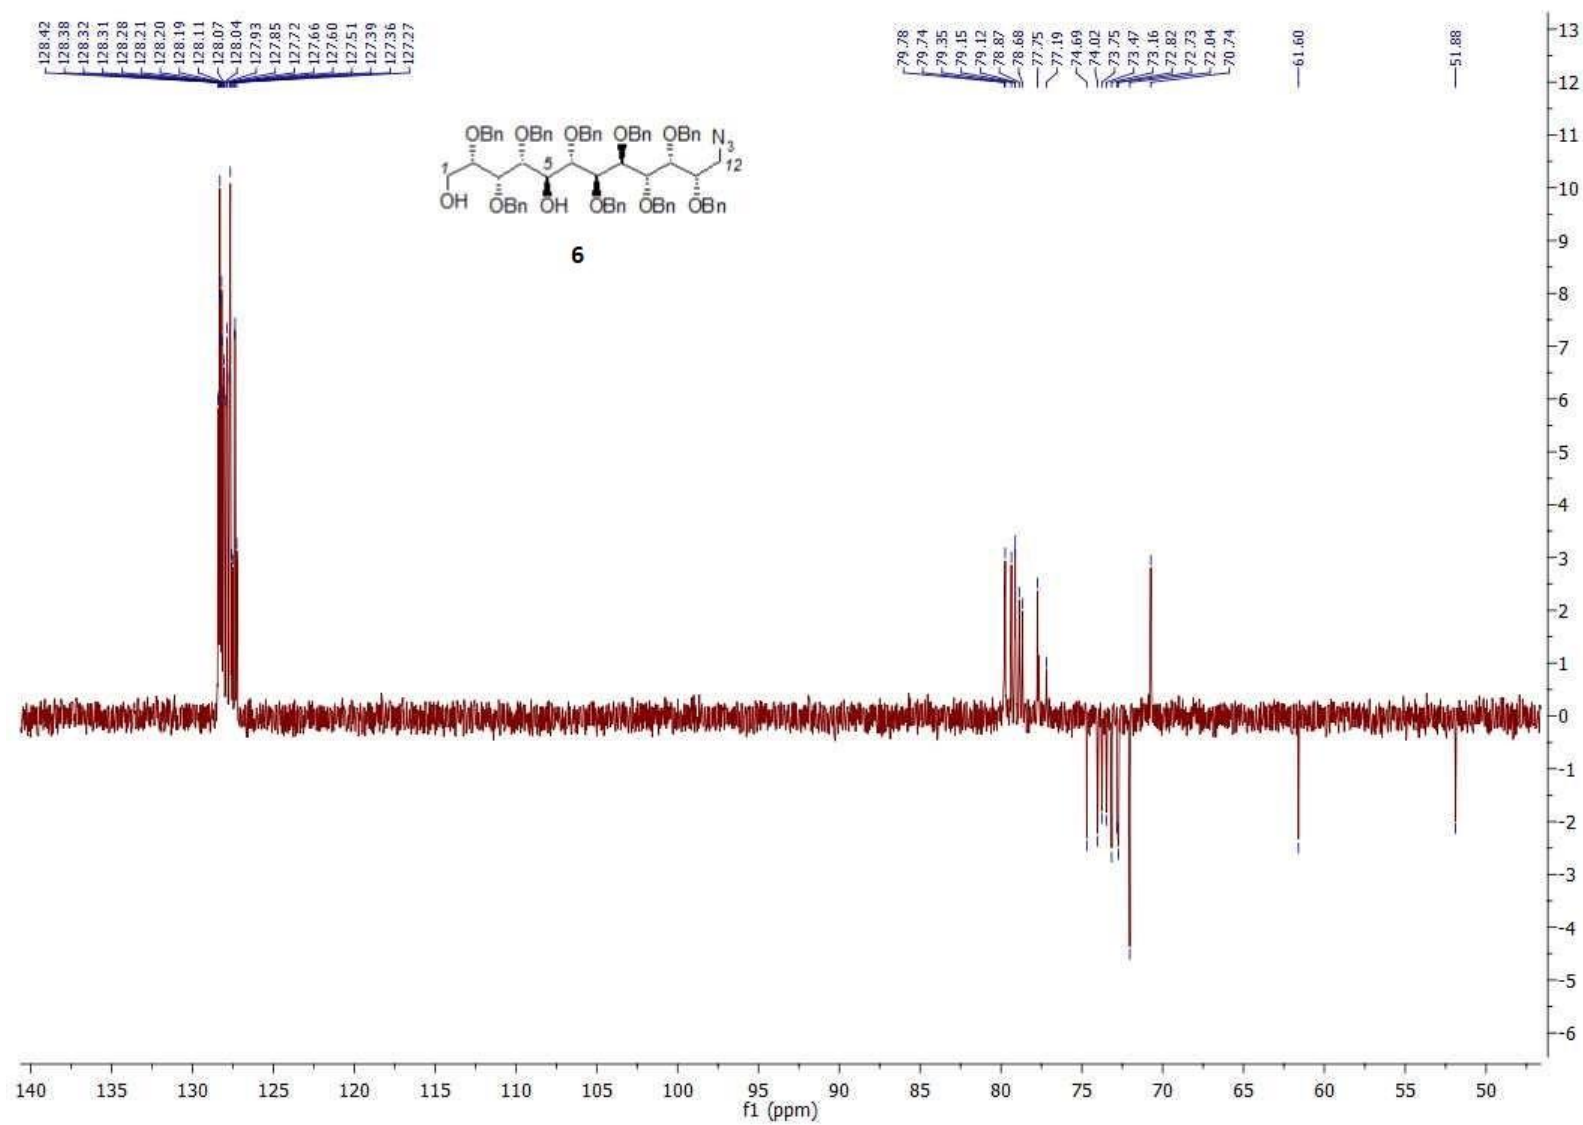

Figure S11: DEPT135 spectrum of compound 6.

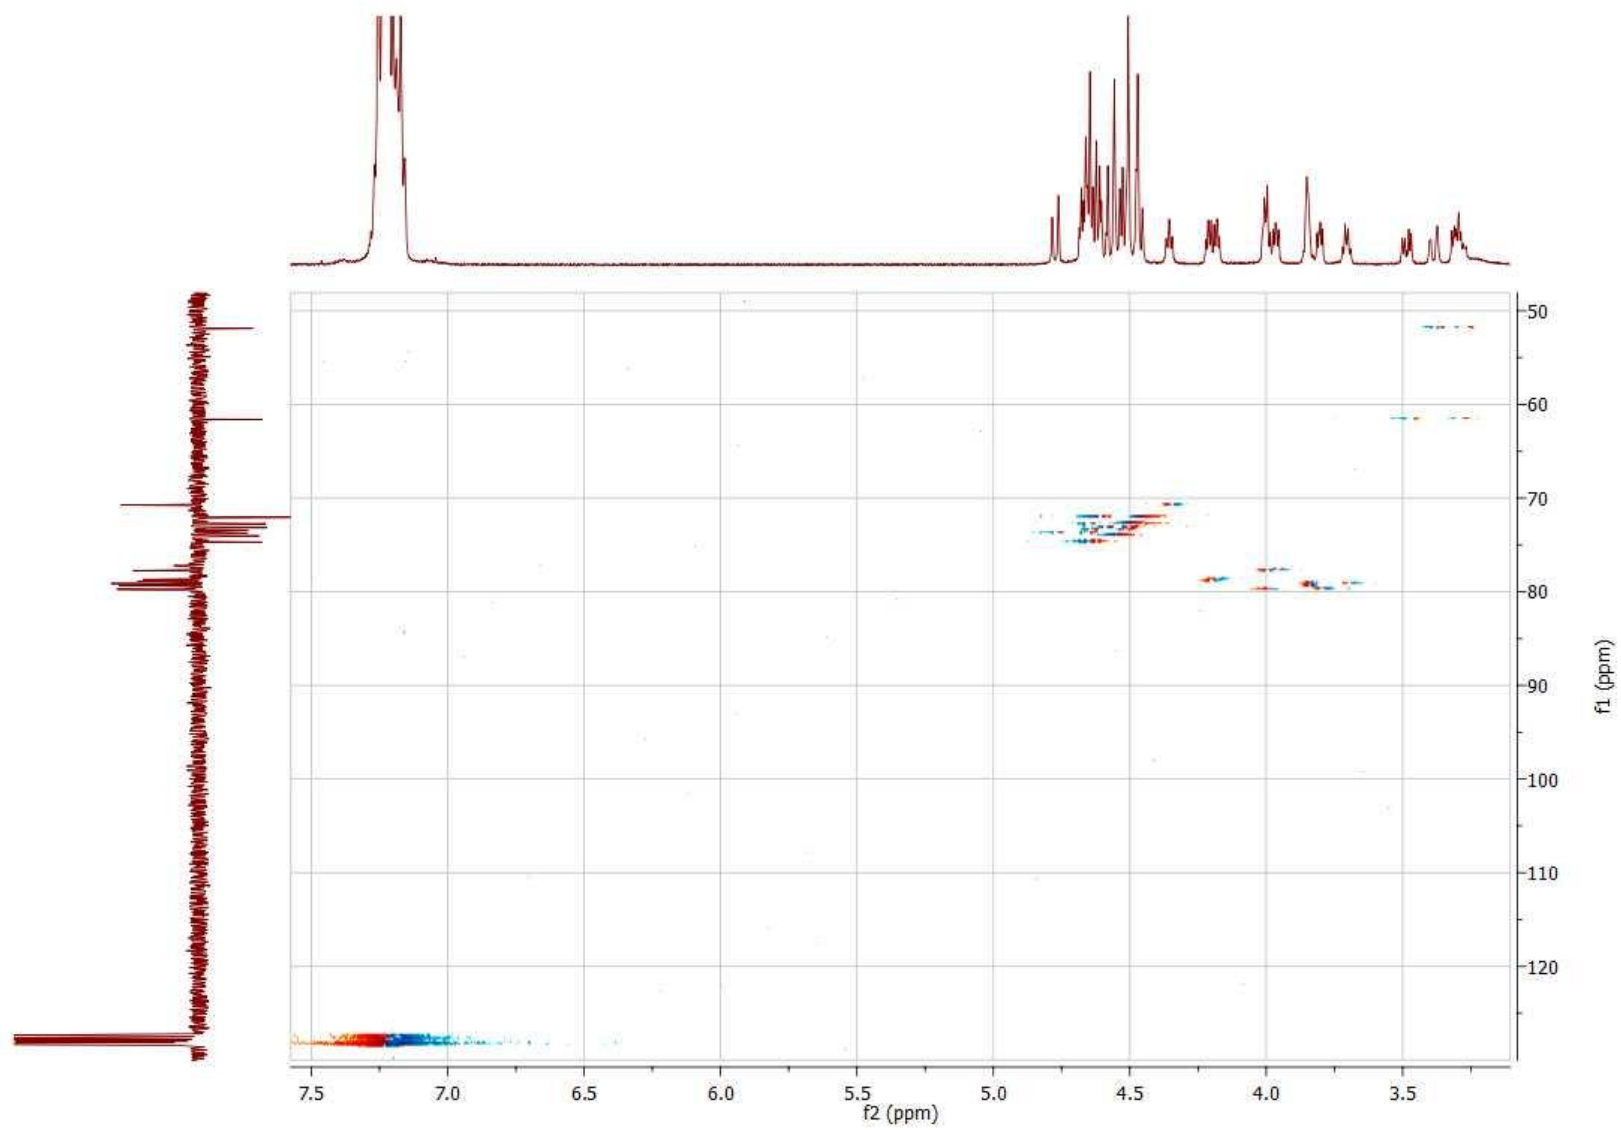

**Figure S12:** gHSQCAD spectrum of compound **6**.

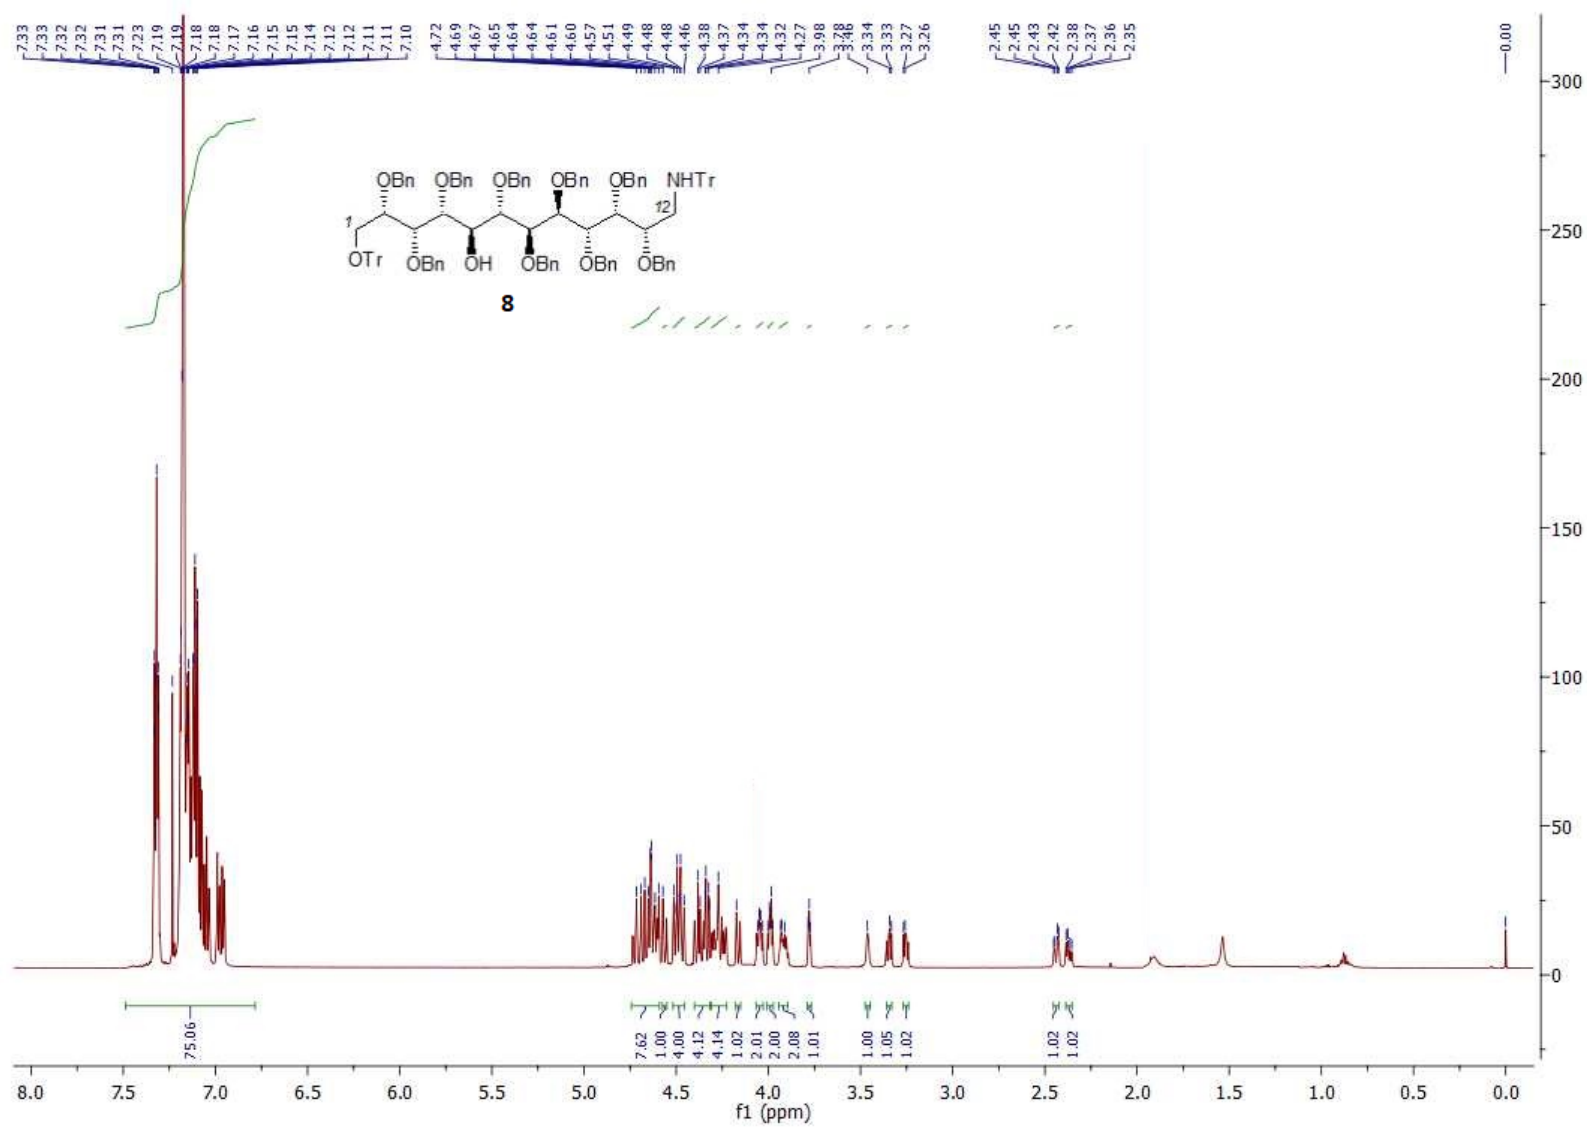

**Figure S13:**  $^1\text{H}$  NMR spectrum of compound **8**.



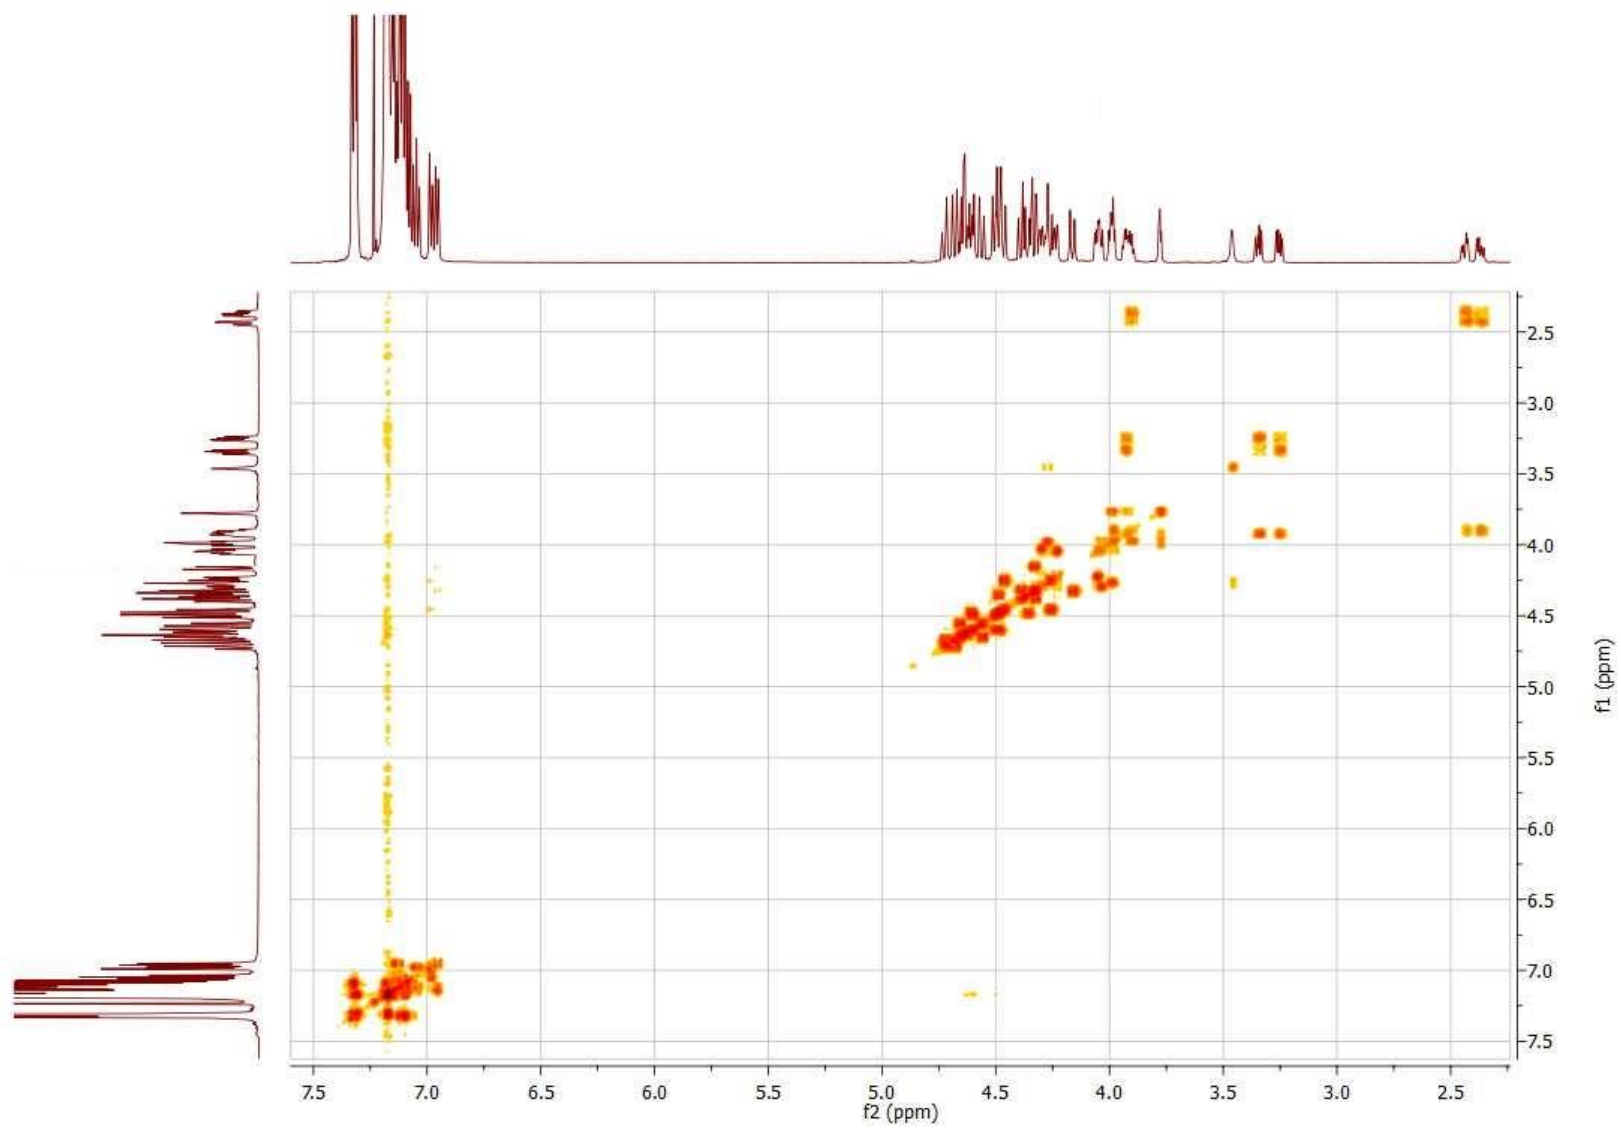

**Figure S15:** gCOSY spectrum of compound **8**.



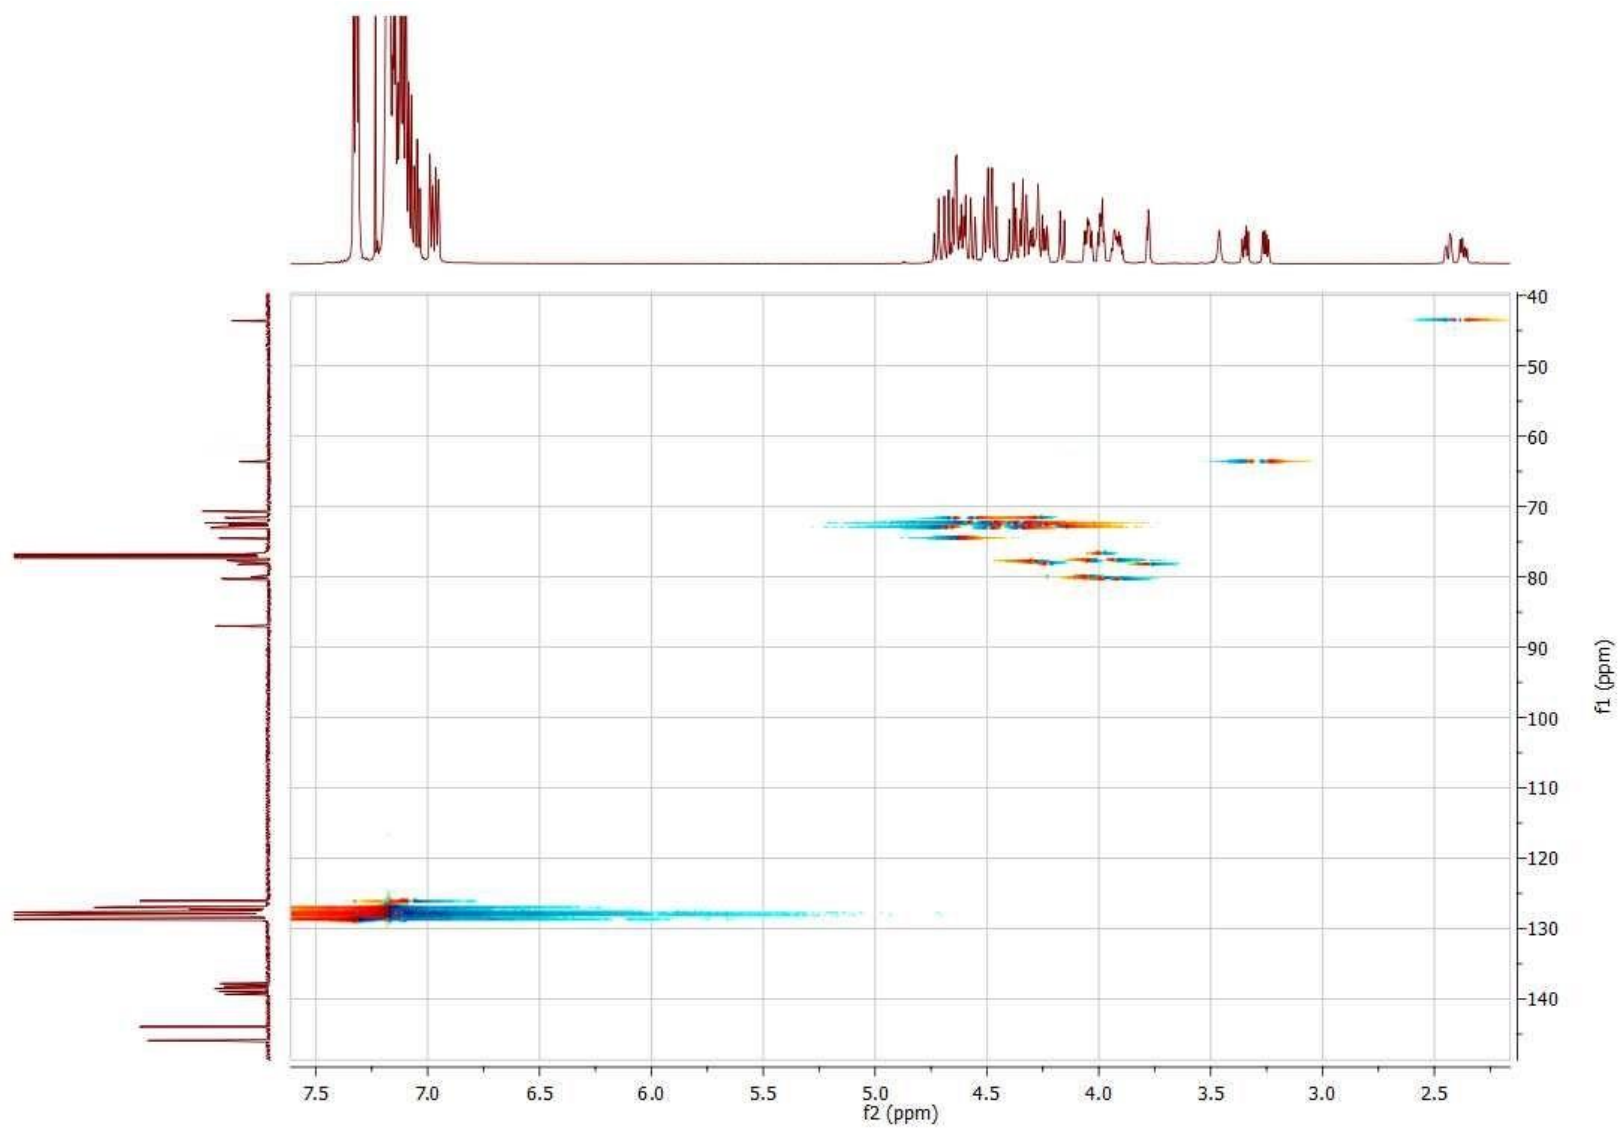

**Figure S16:** gHSQCAD spectrum of compound **8**.

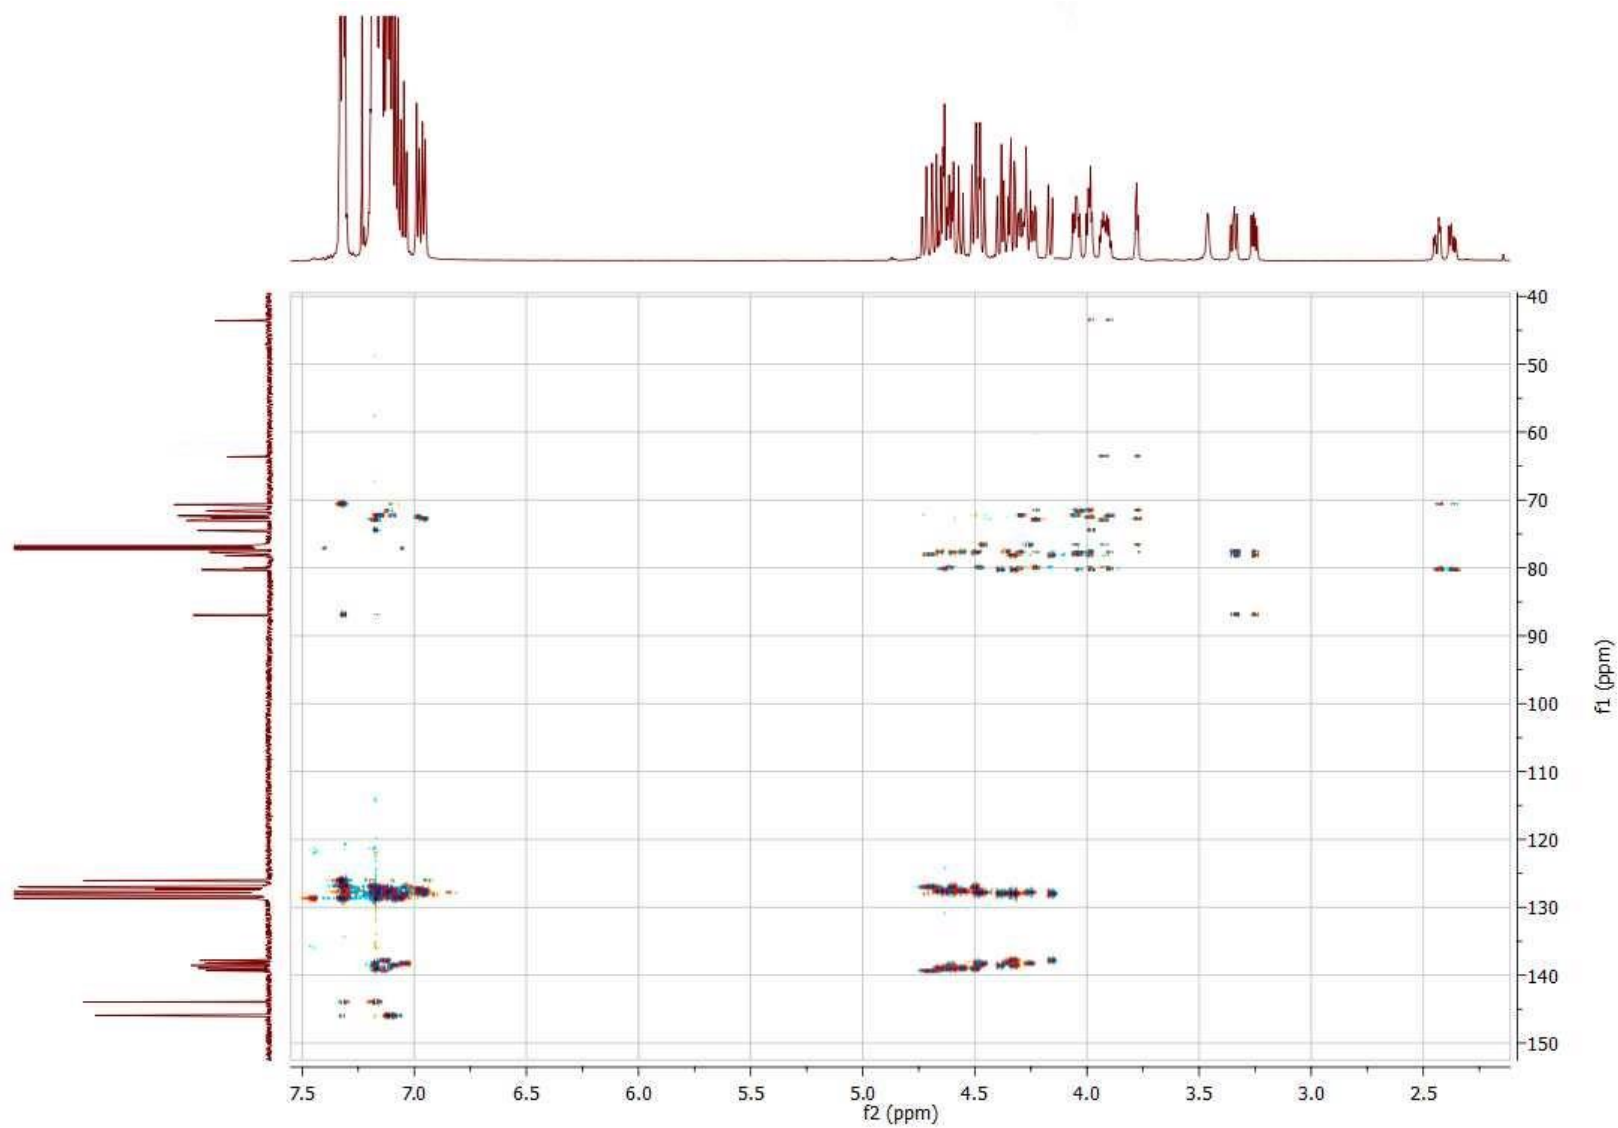

**Figure S17:** gHMBCAD spectrum of compound **8**.

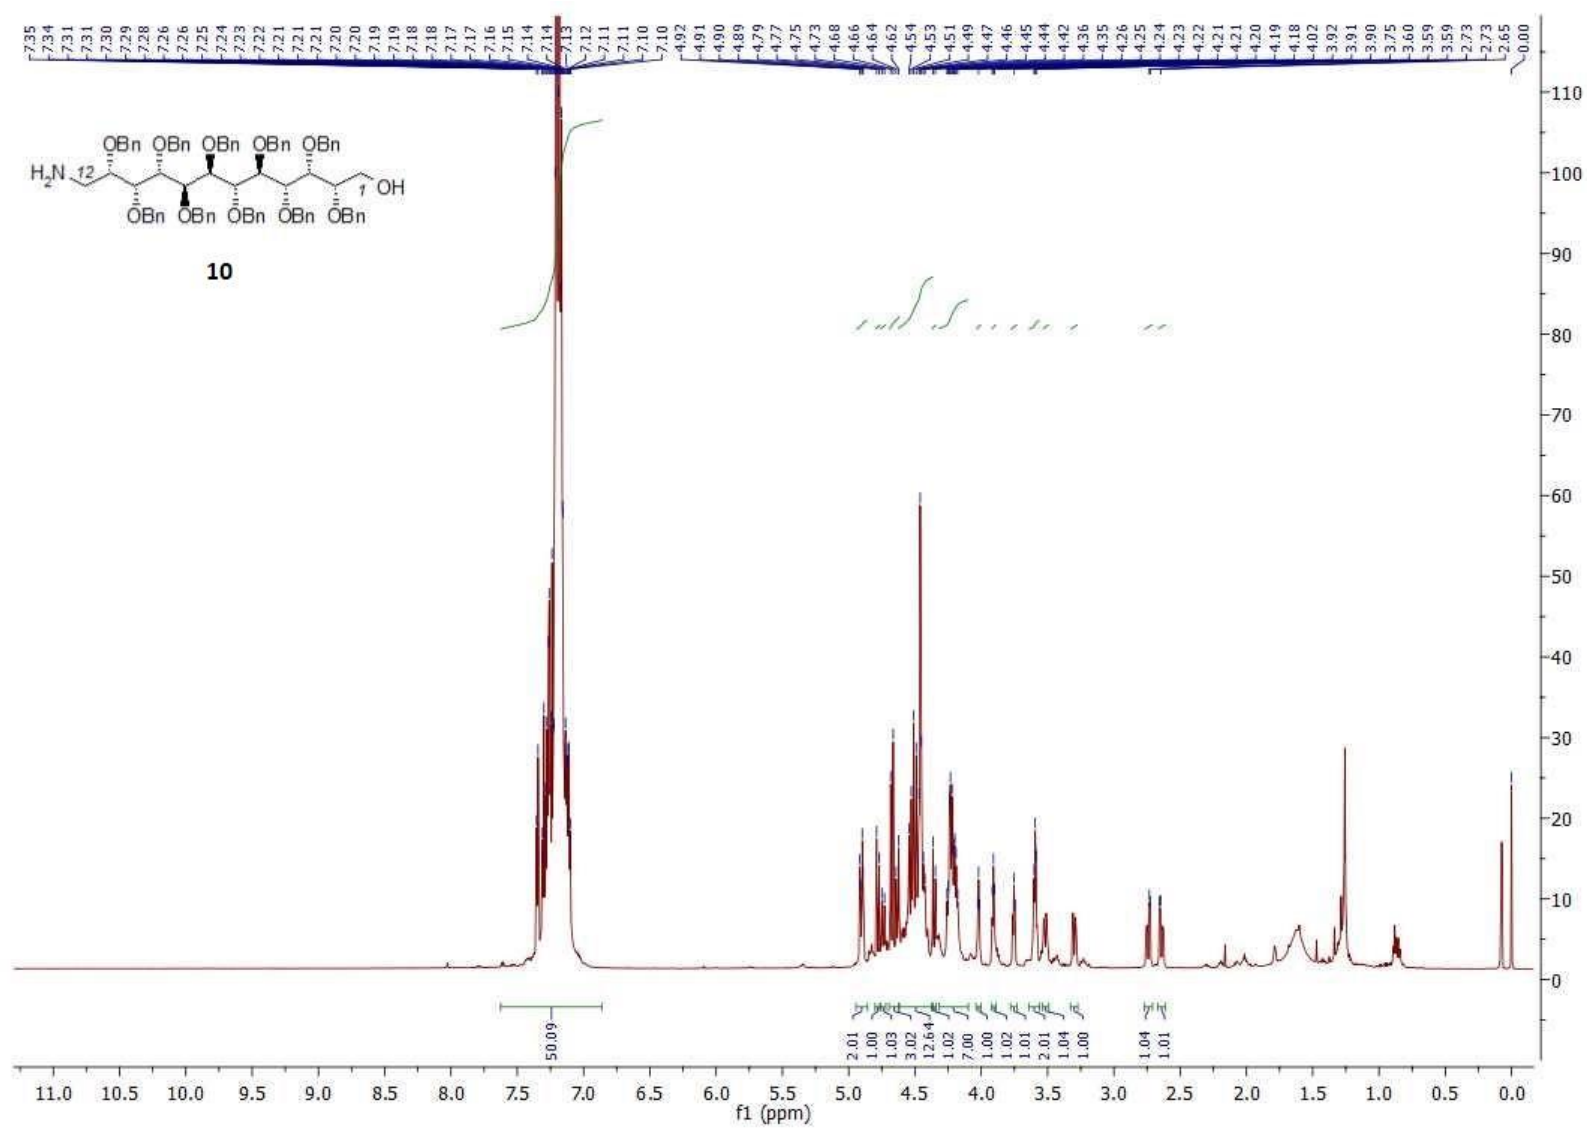

Figure S18:  $^1\text{H}$  NMR spectrum of compound **10**.

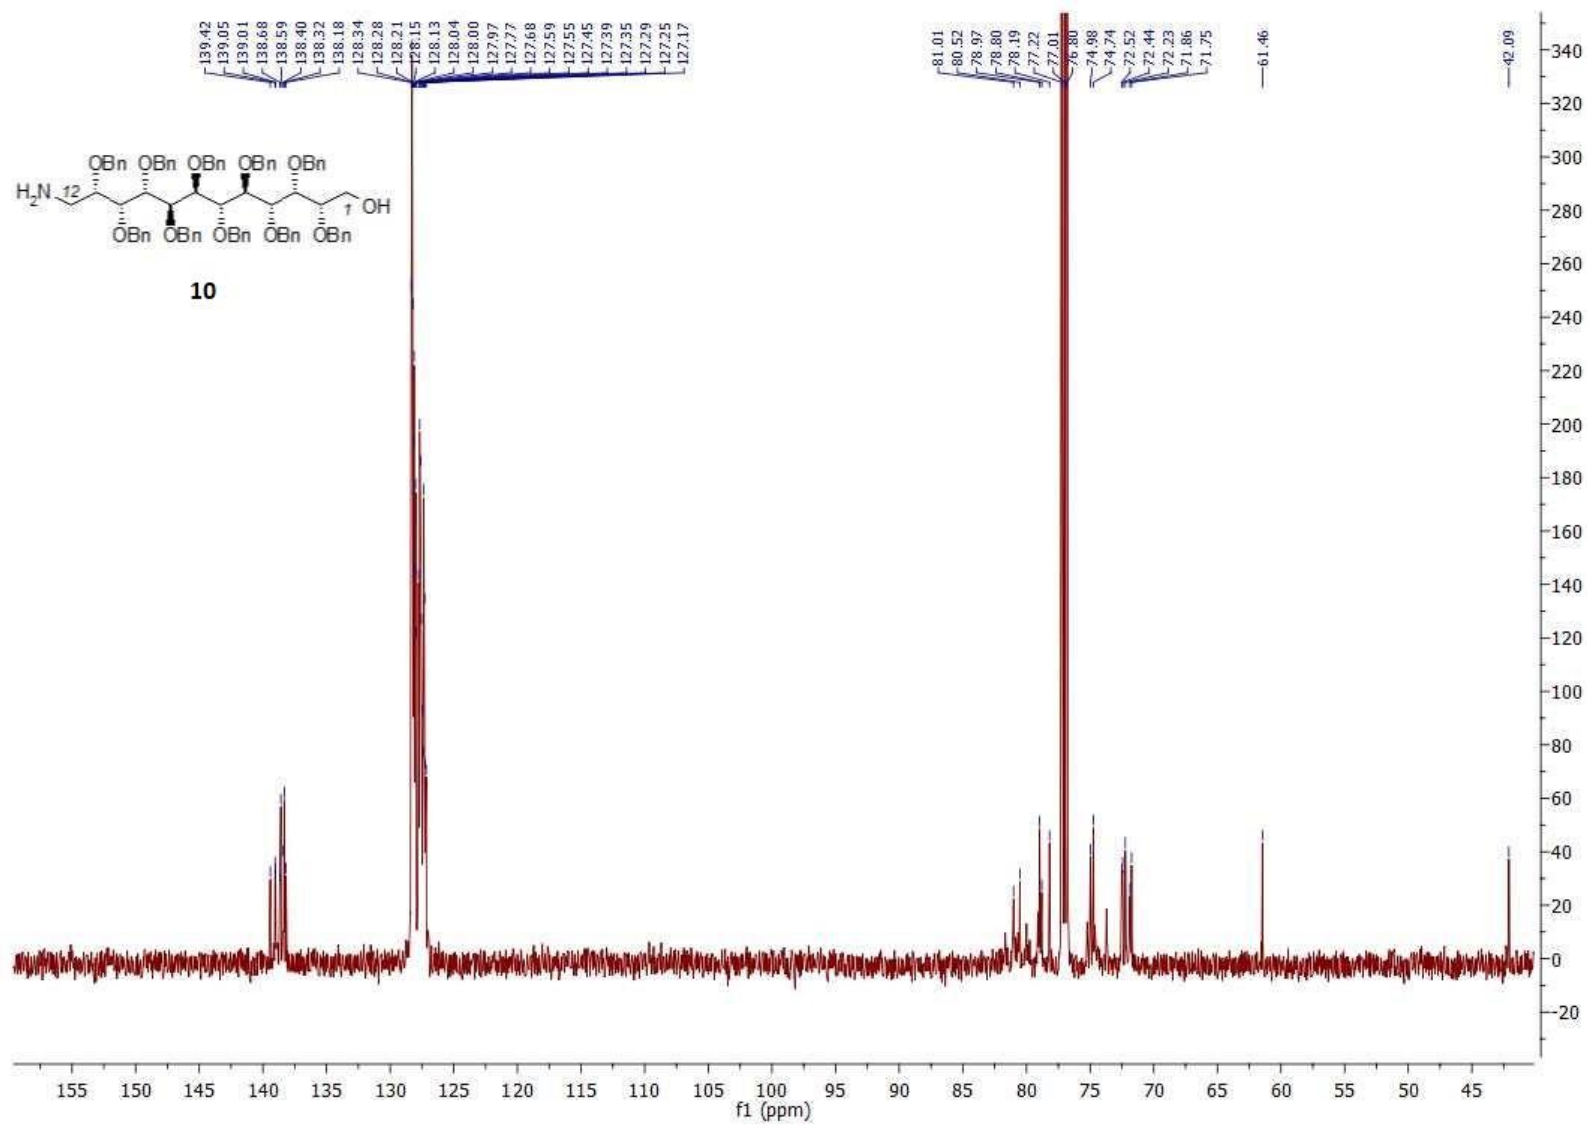

Figure S19:  $^{13}\text{C}$  NMR spectrum of compound **10**.

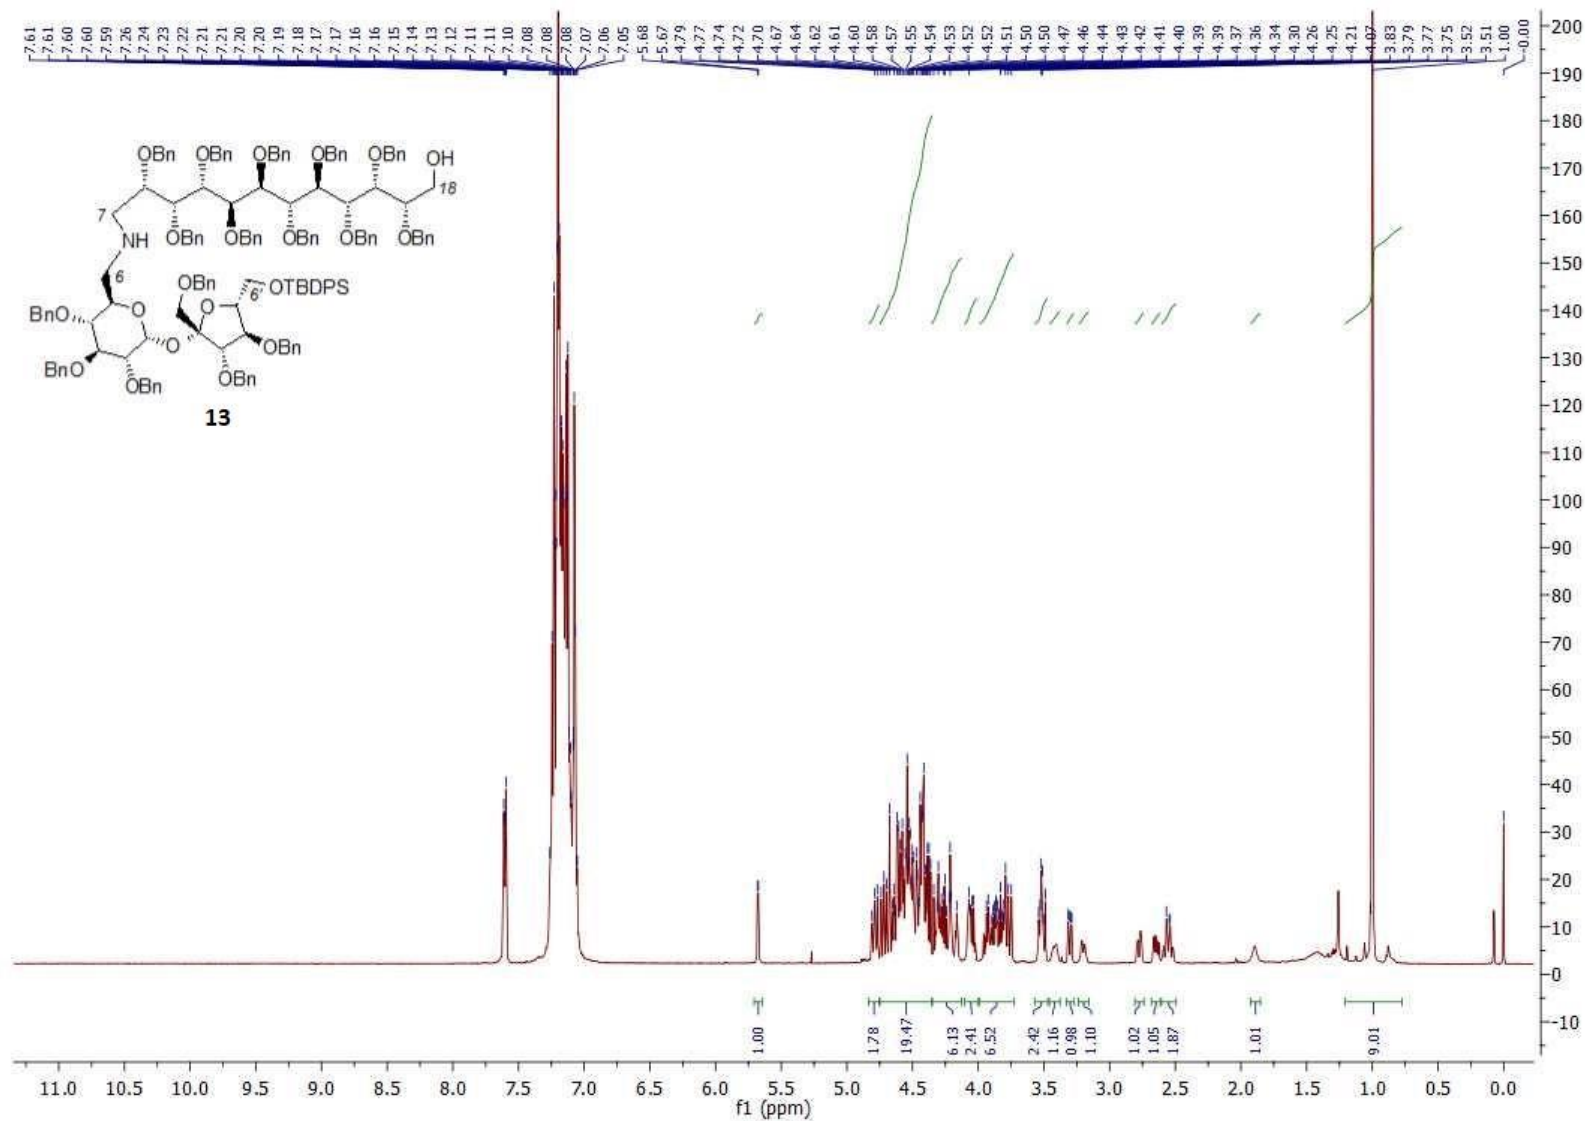

Figure S20:  $^1\text{H}$  NMR spectrum of compound **13**.

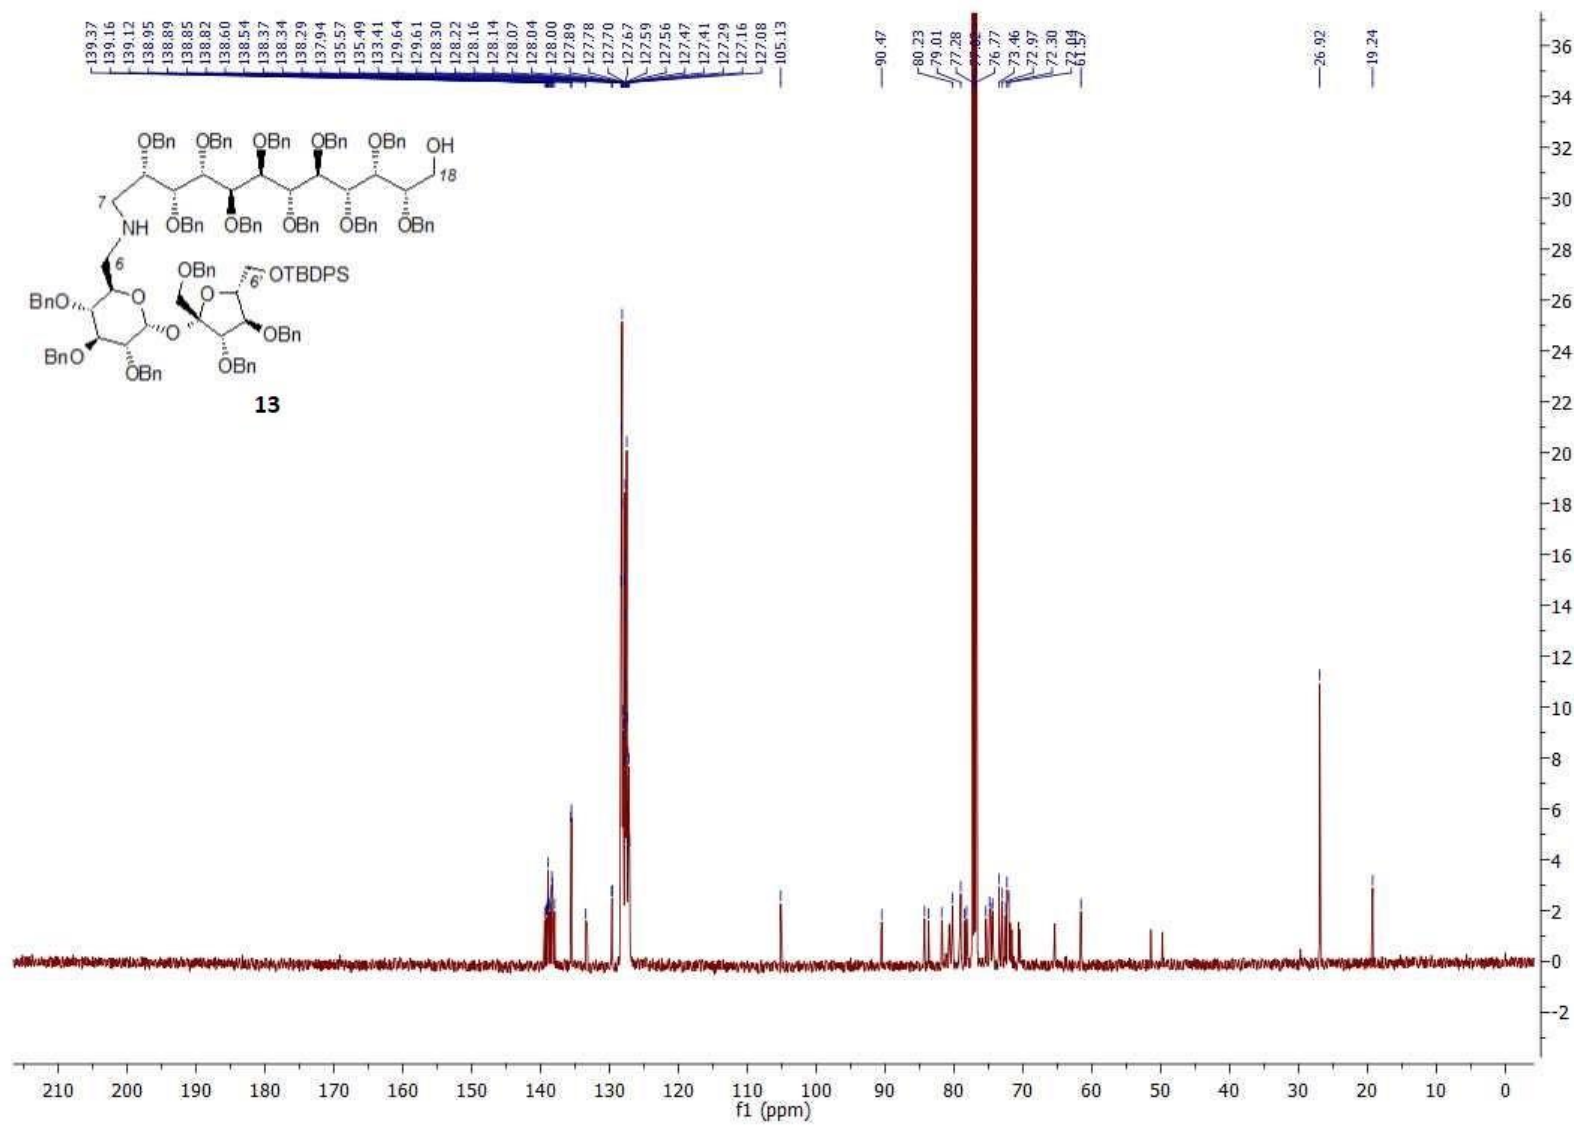

Figure S21:  $^{13}\text{C}$  NMR spectrum of compound **13**.

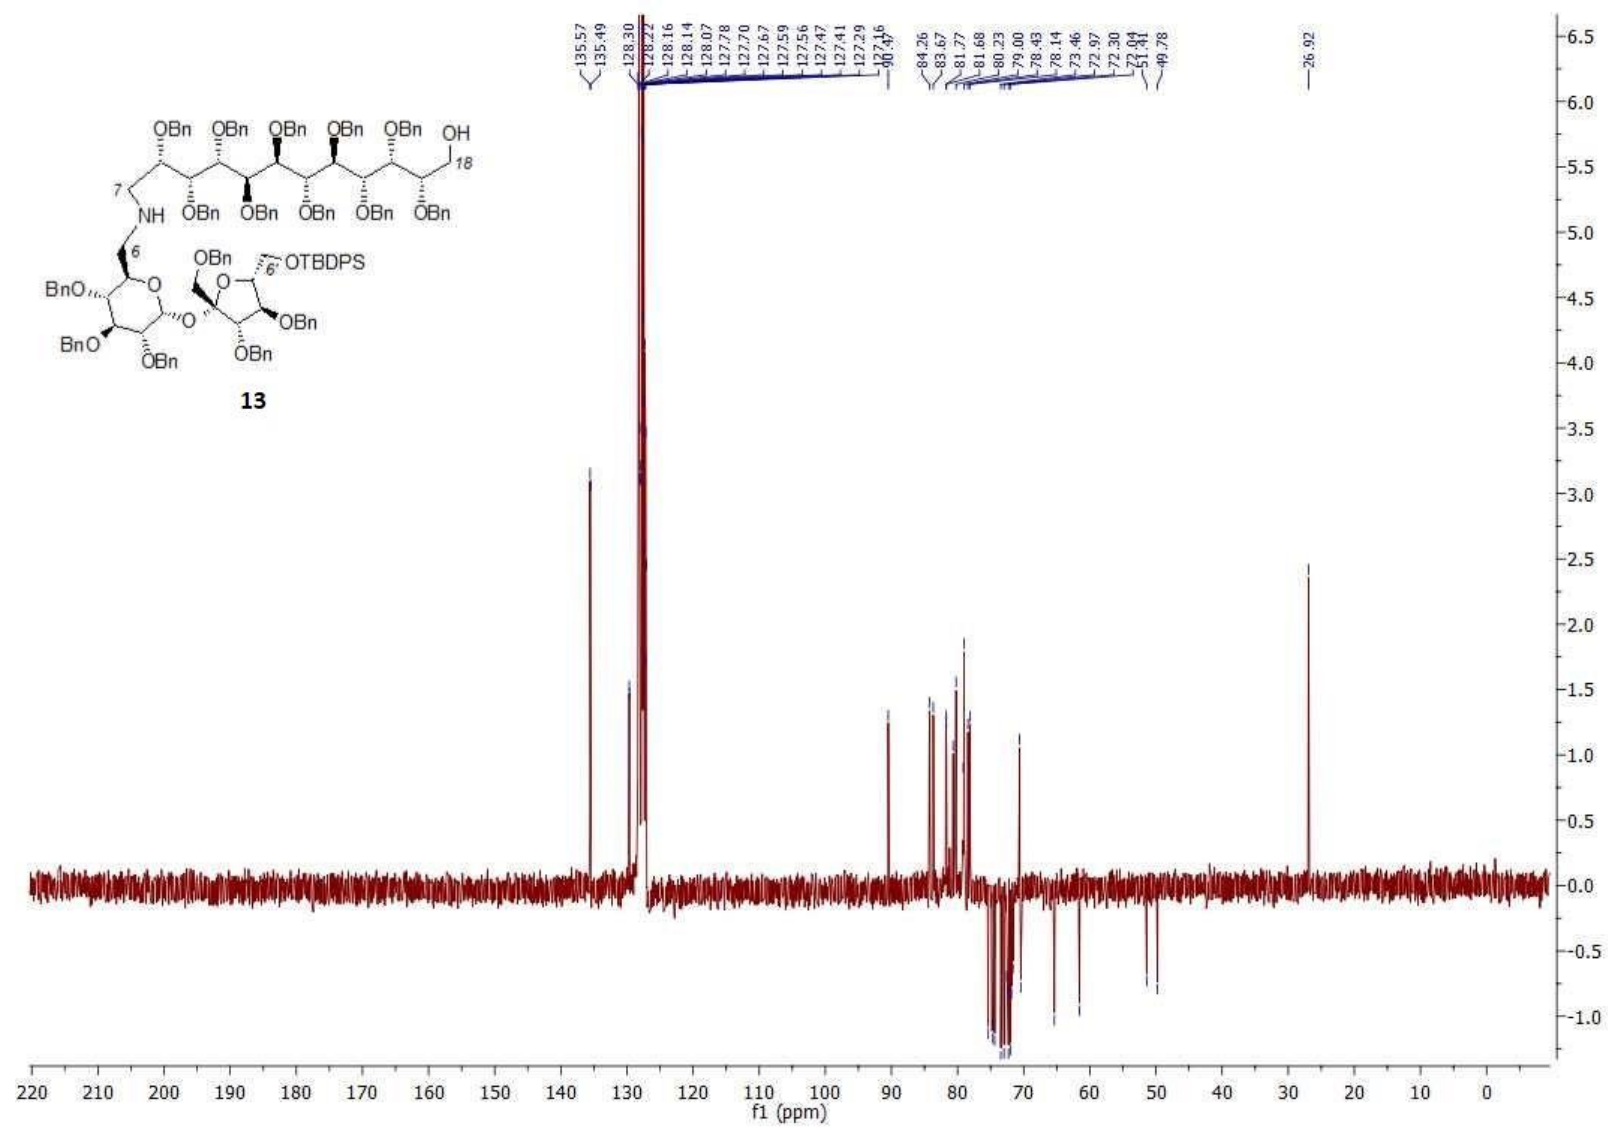

**Figure S22:** DEPT135 spectrum of compound **13**.

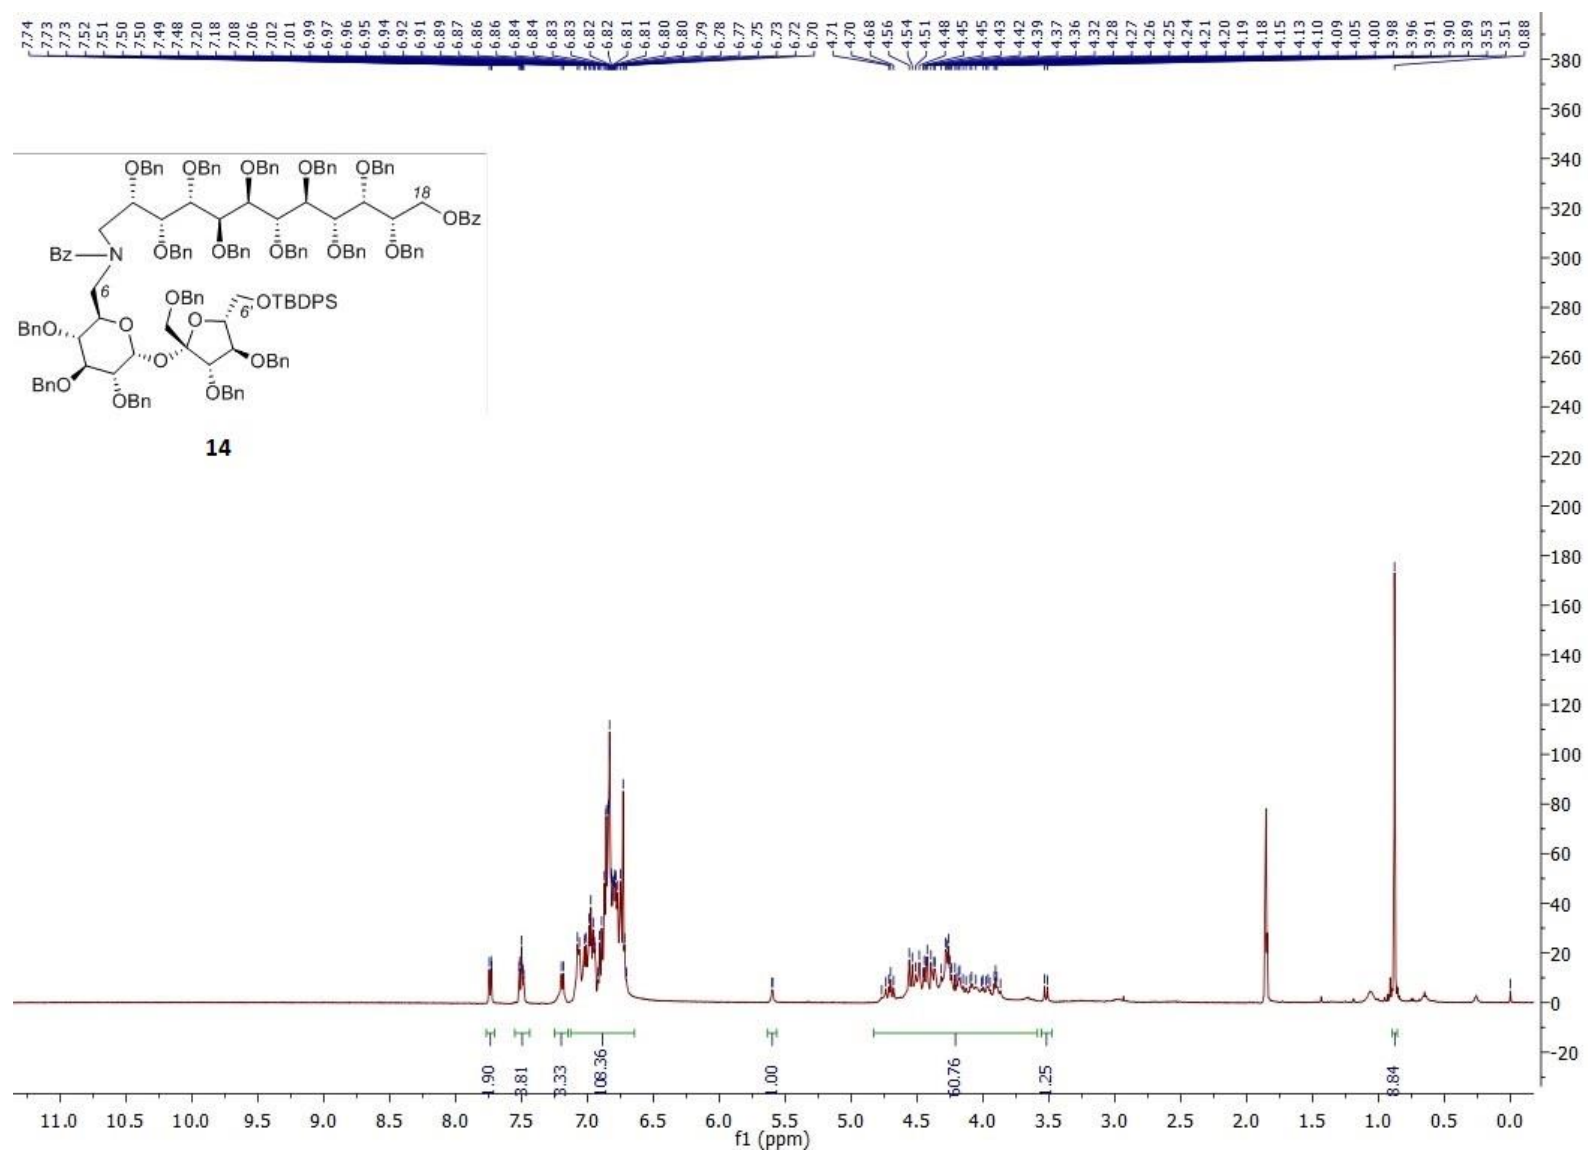

Figure S23:  $^1\text{H}$  NMR spectrum of compound **14**.



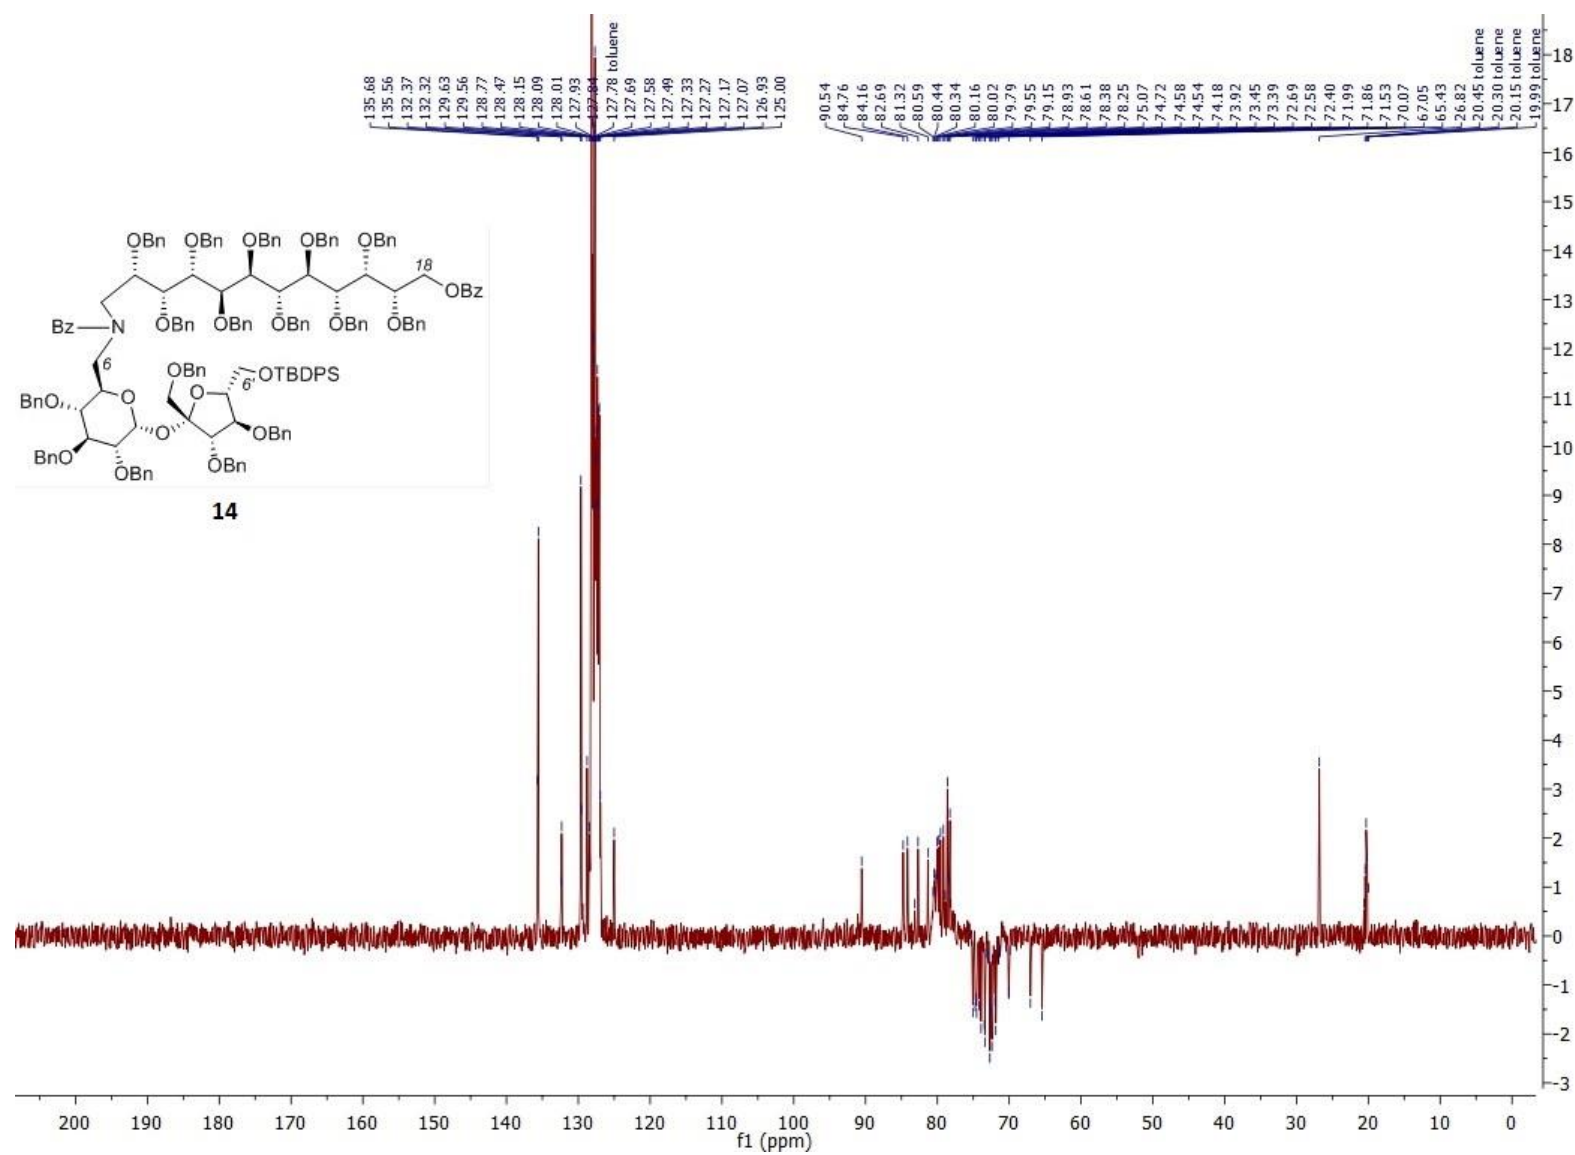

Figure S24: DEPT135 spectrum of compound **14**.

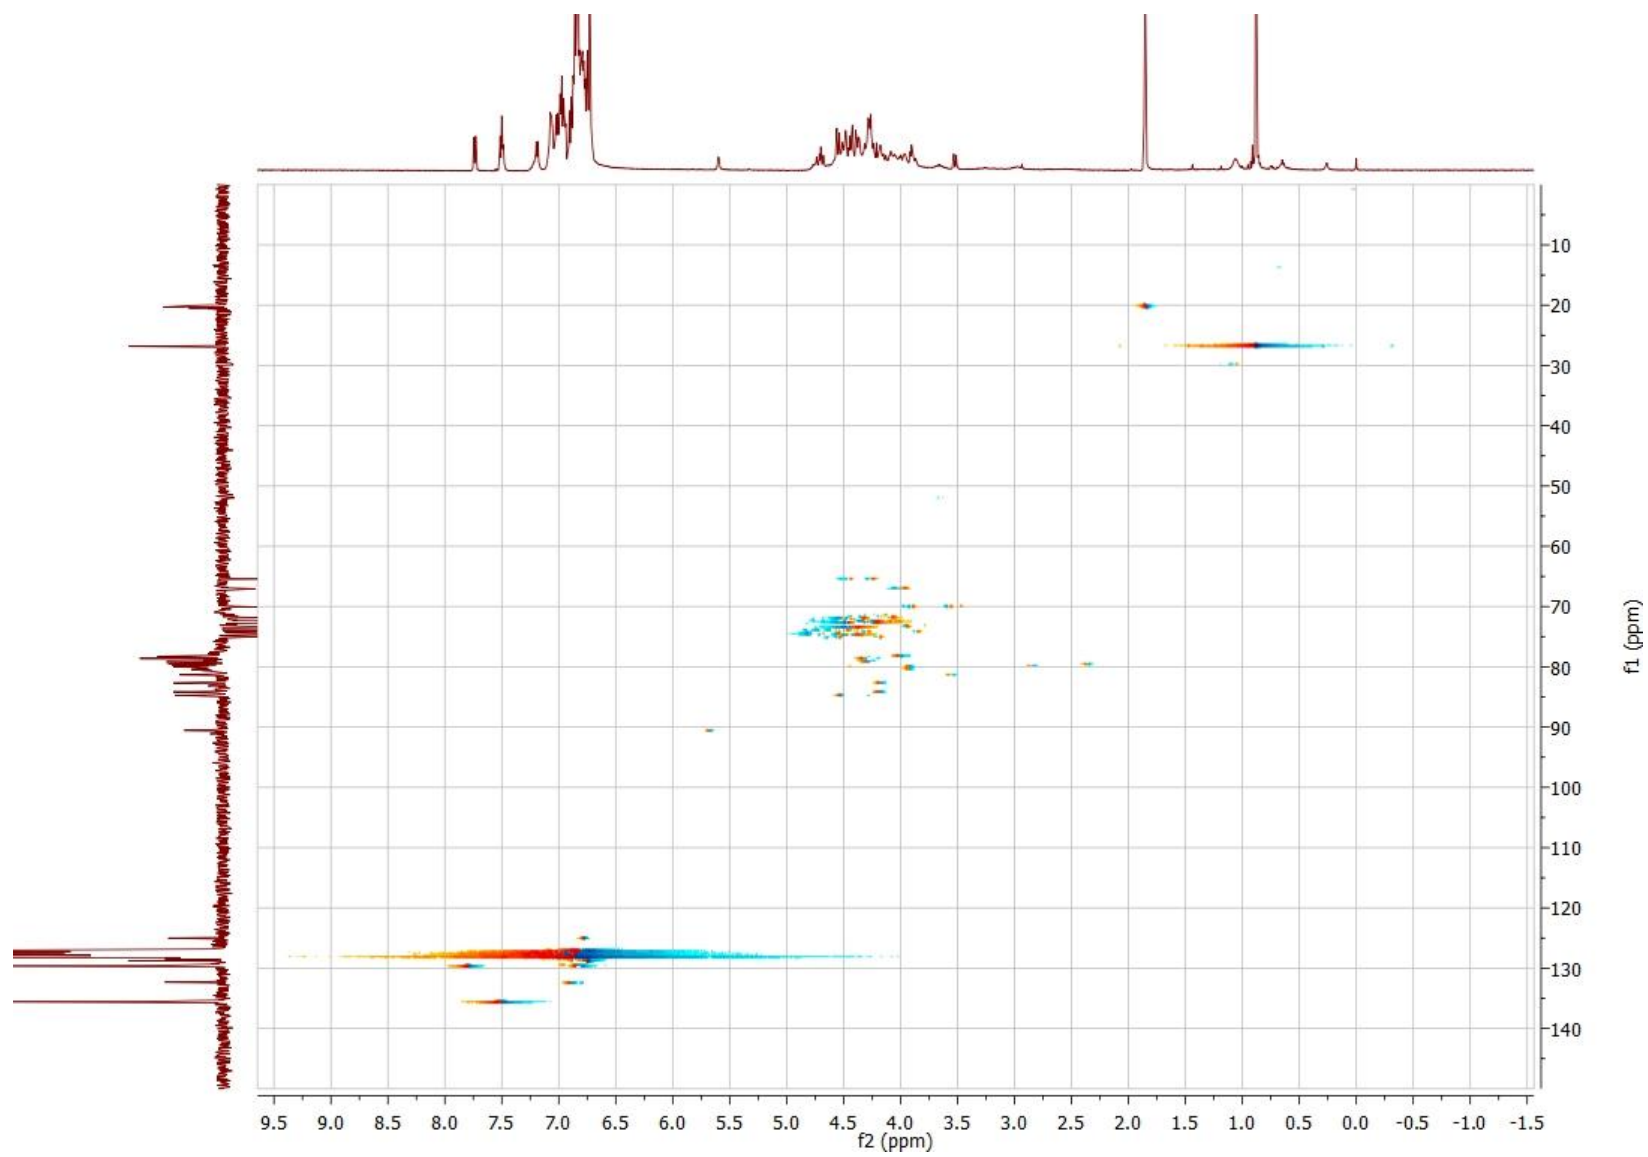

**Figure S25:** gHSQCAD spectrum of compound **14**.

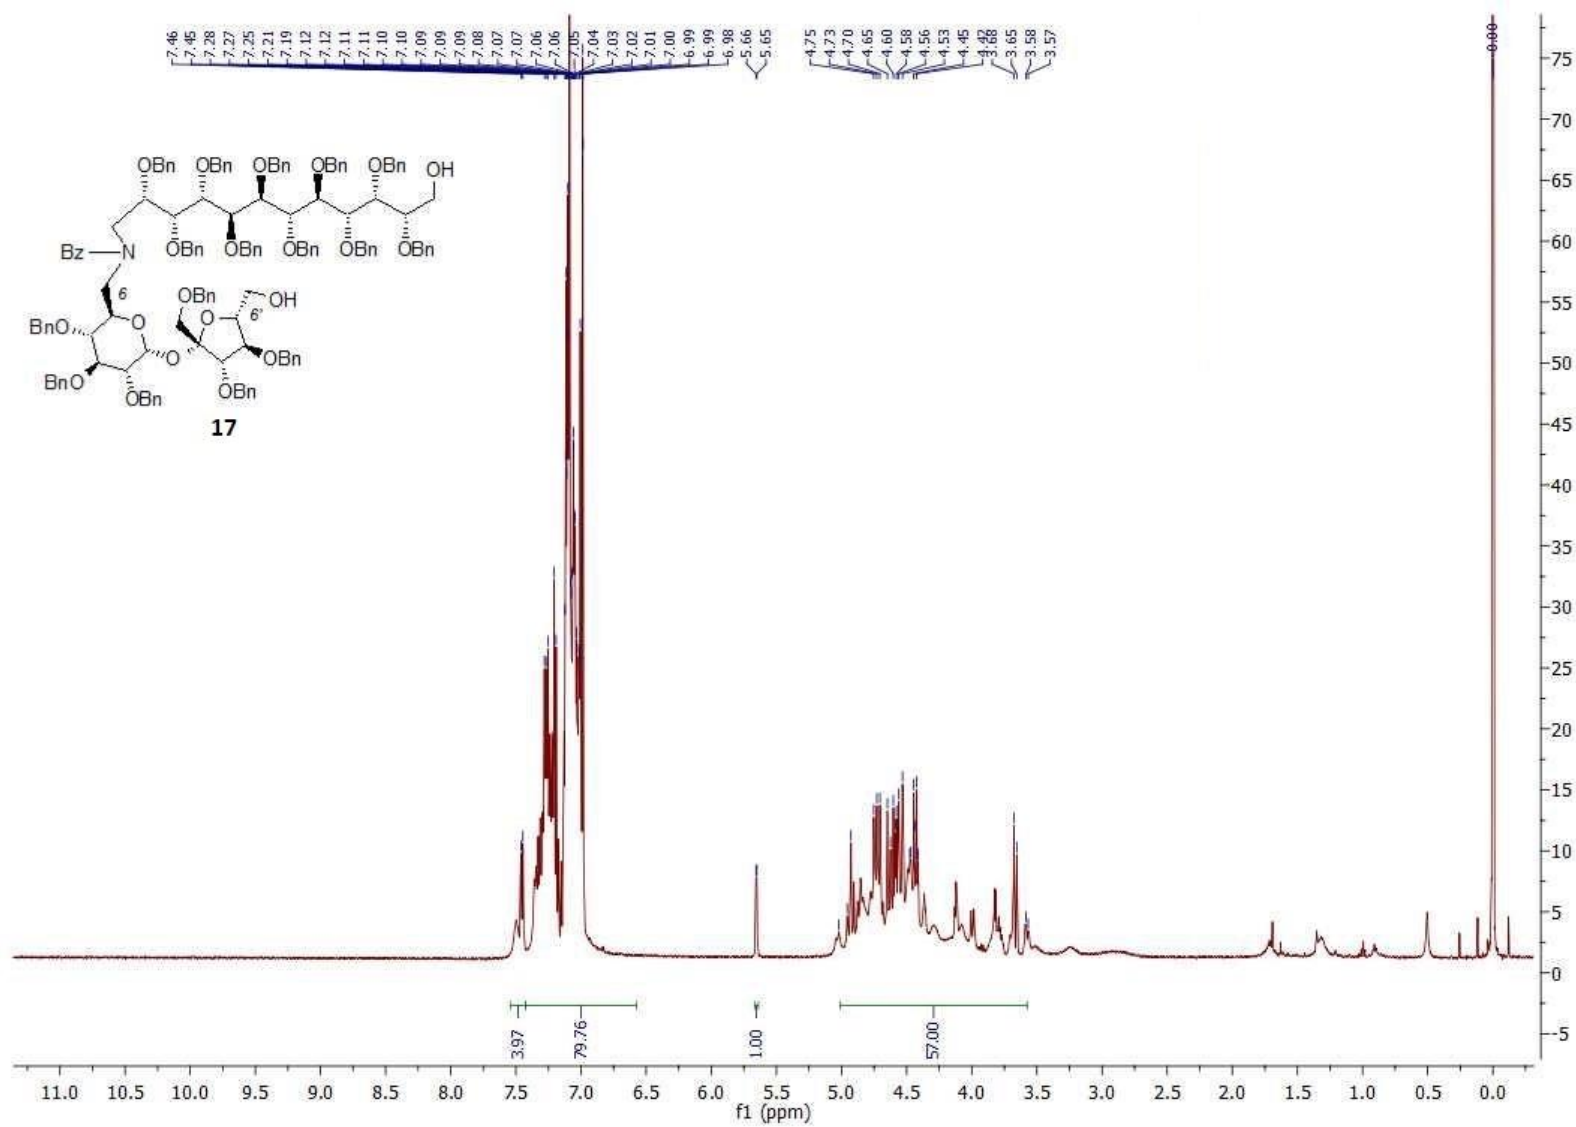

Figure S26:  $^1\text{H}$  NMR spectrum of compound **17**.

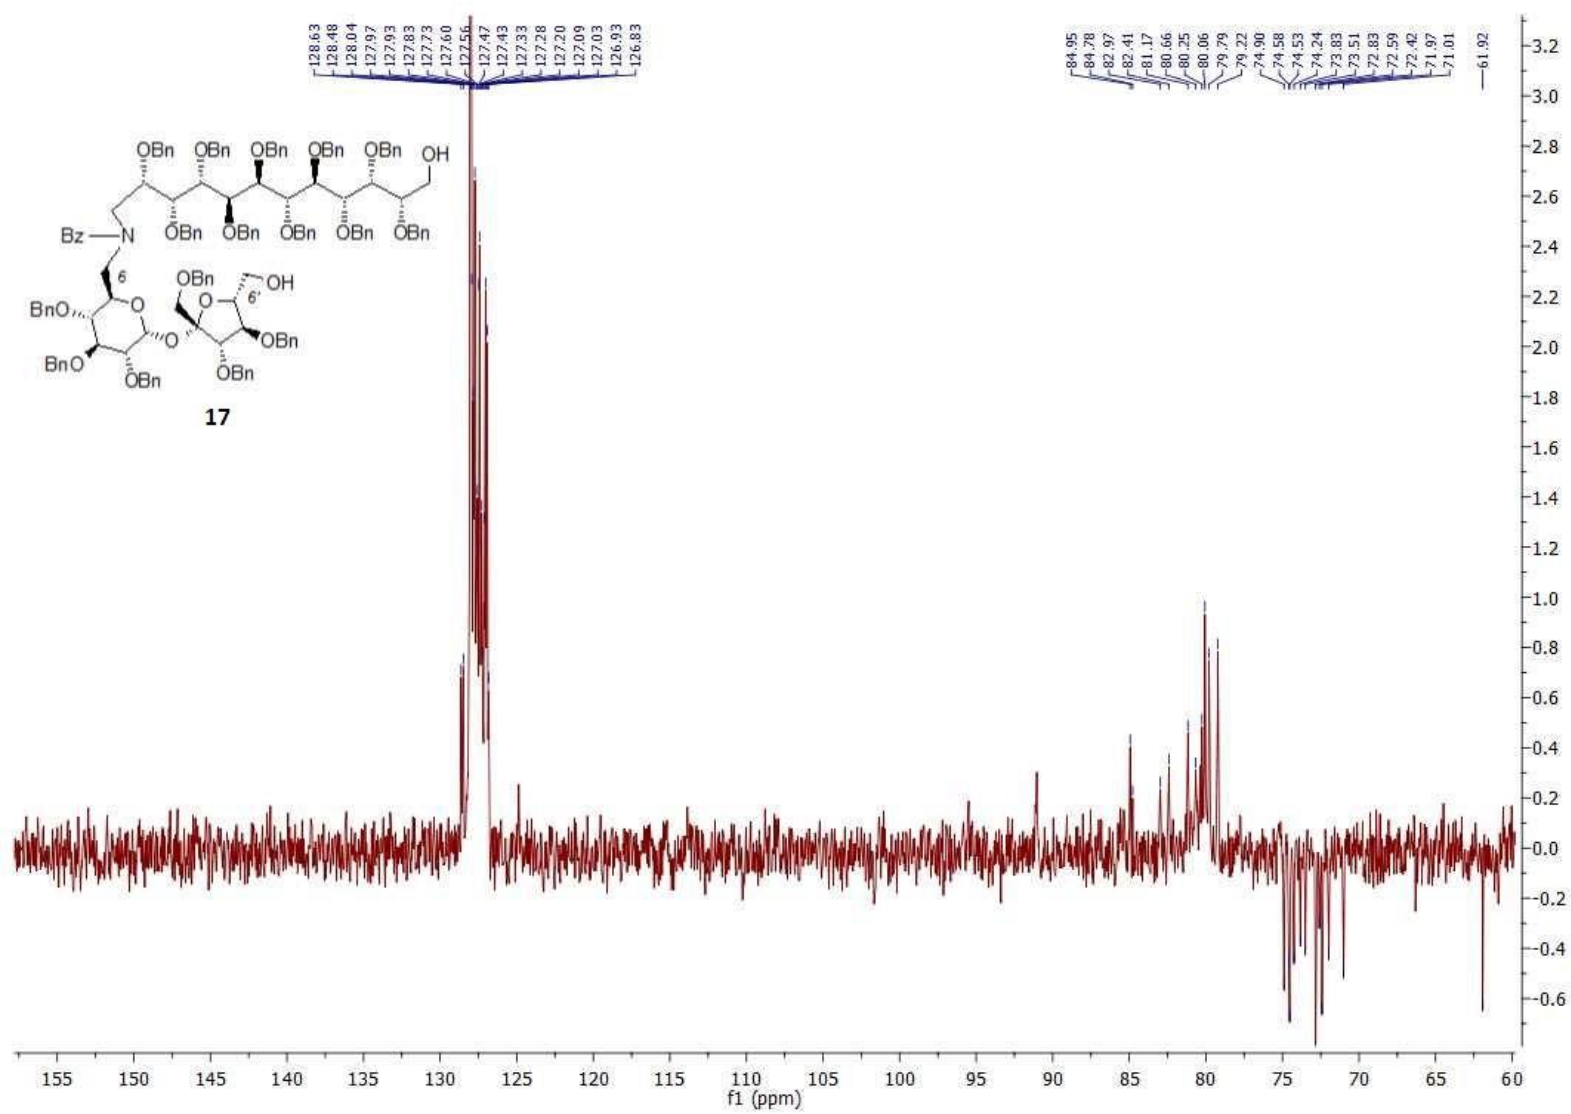

Figure S27: DEPT135 spectrum of compound **17**.
